# Supplementary material
Source: ML conference proceedings conference paper supplement (https://openreview.net/forum?id=DTqx3iqjkz)
Supplement: supplementary_material [file attachment]

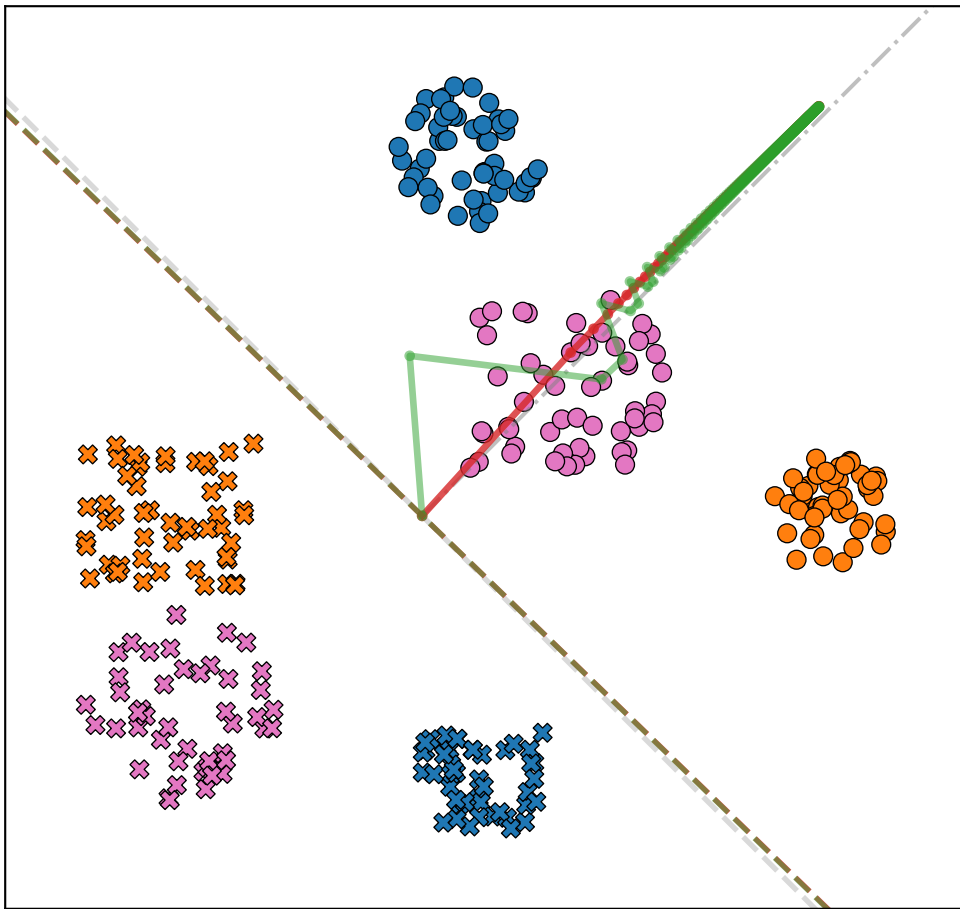

- Joint Max-margin Direction
- Joint Training trajectory
- Continual Learning trajectory
- Task 0 Data ( $y = +1$ )
- Task 0 Data ( $y = -1$ )
- Task 1 Data ( $y = +1$ )
- Task 1 Data ( $y = -1$ )
- Task 2 Data ( $y = +1$ )
- Task 2 Data ( $y = -1$ )
