# Supplementary material
Source: ML conference proceedings conference paper supplement (https://openreview.net/forum?id=DTqx3iqjkz)

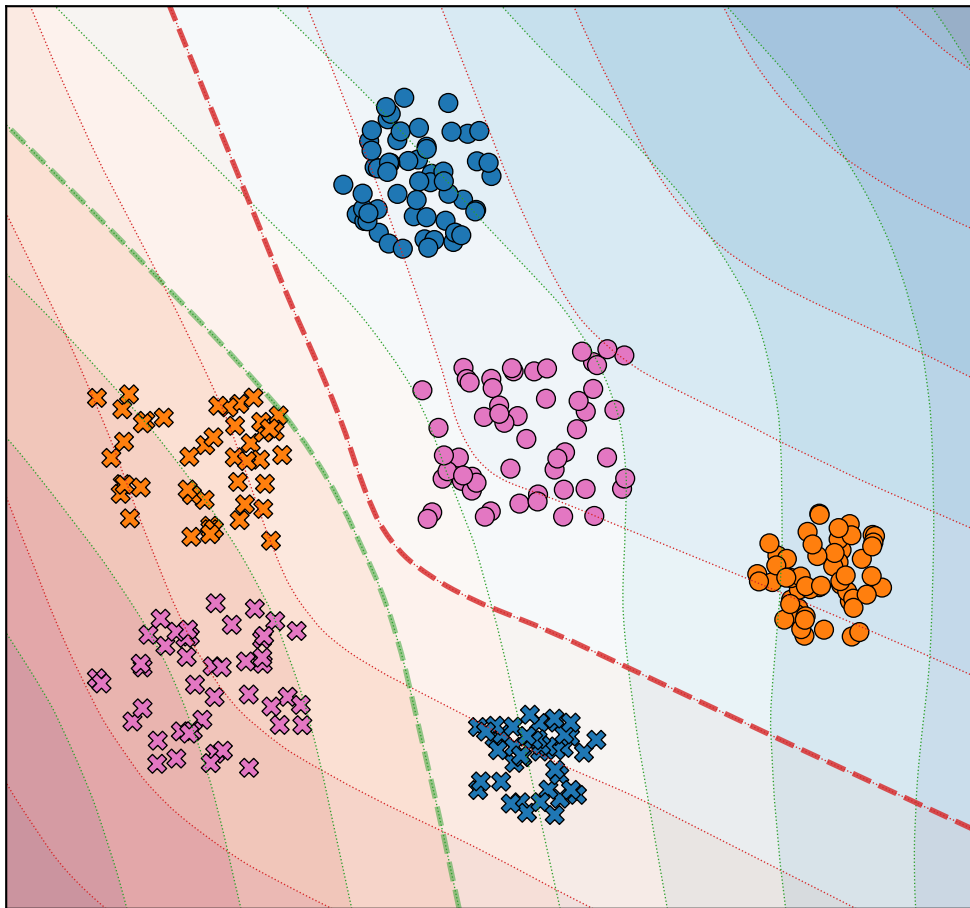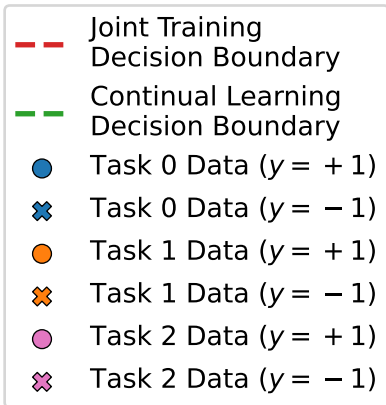

Supplement: supplementary_material [file attachment]

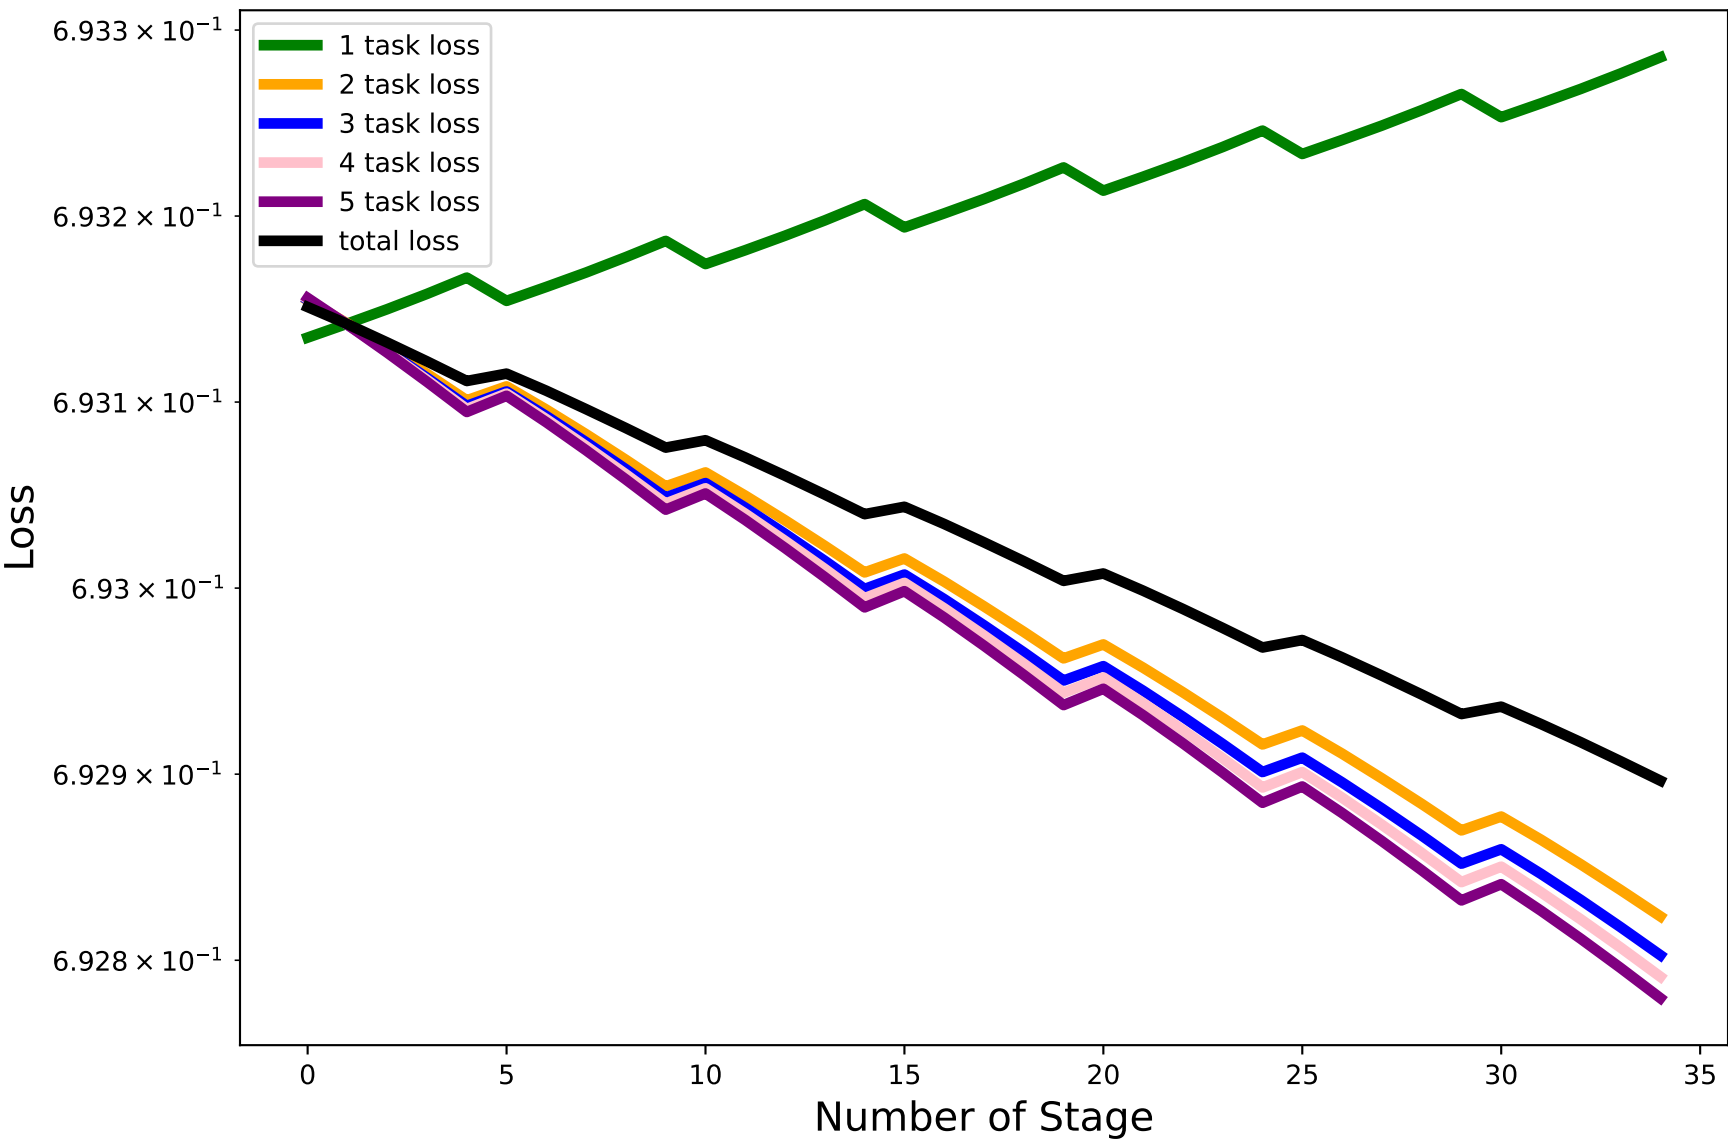

Supplement: supplementary_material [file attachment]

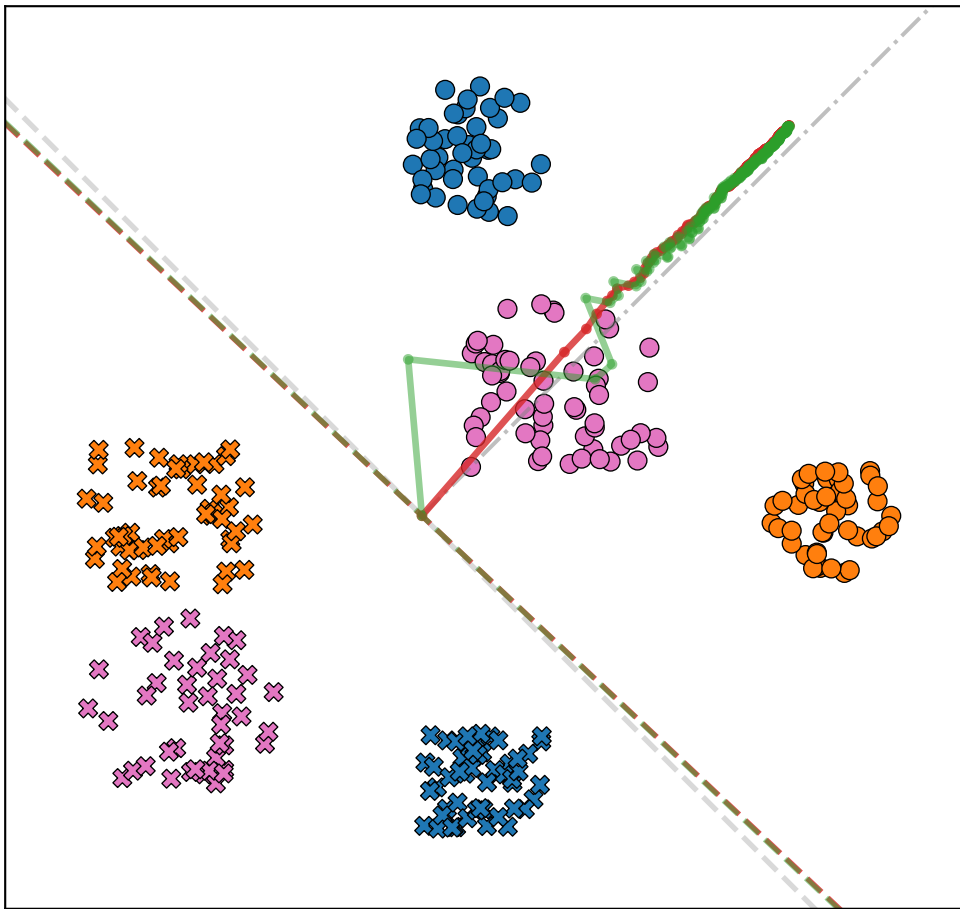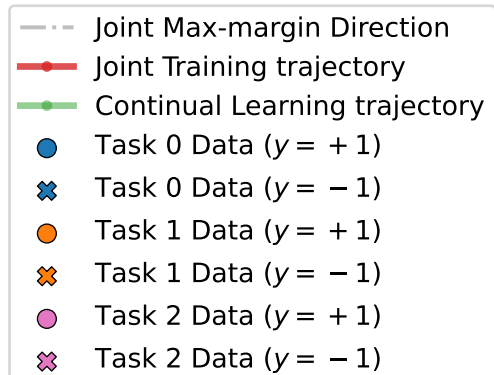

Supplement: supplementary_material [file attachment]

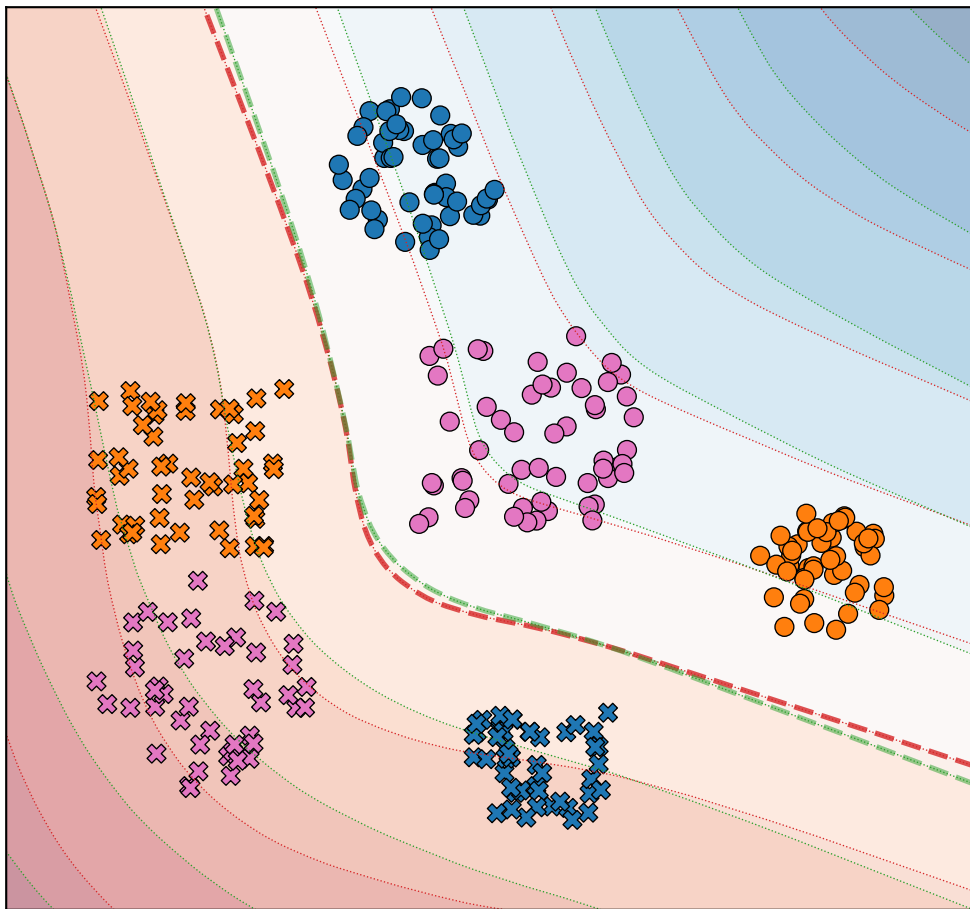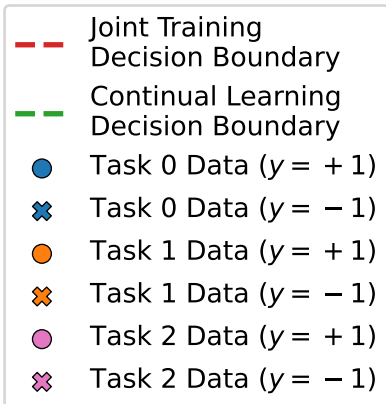

Supplement: supplementary_material [file attachment]

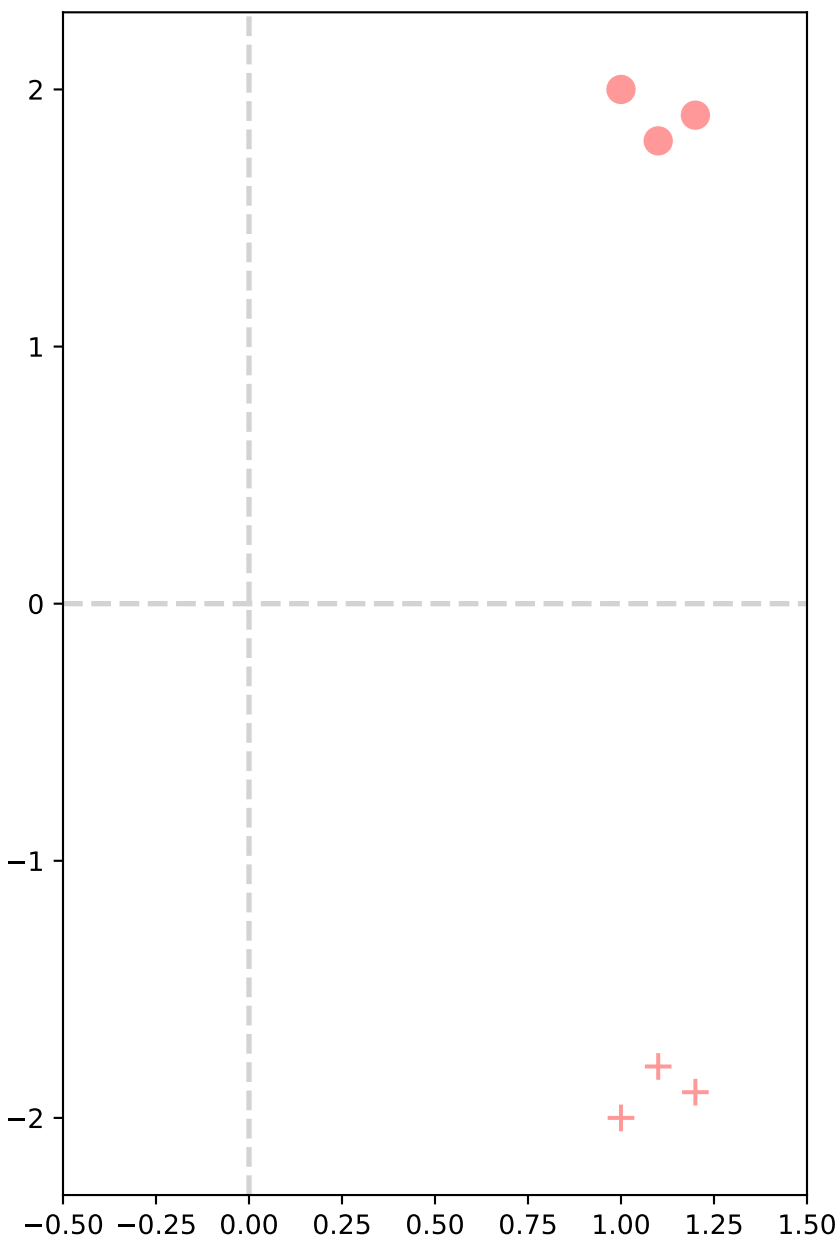

Supplement: supplementary_material [file attachment]

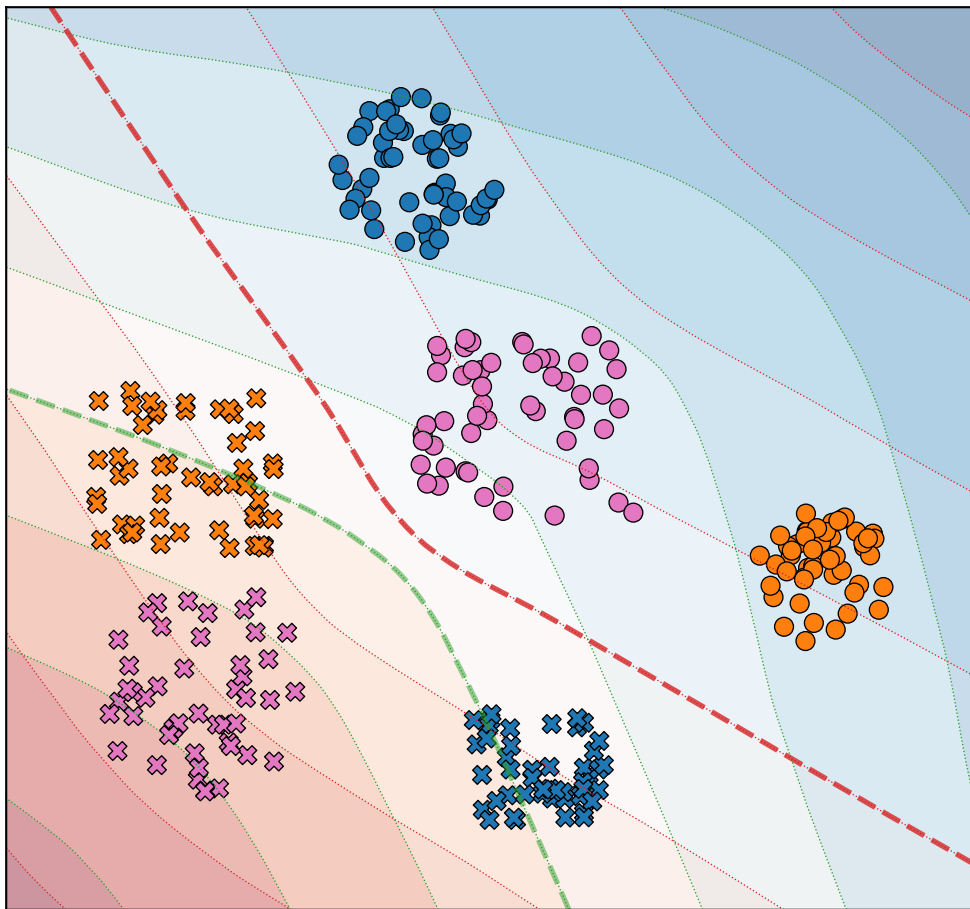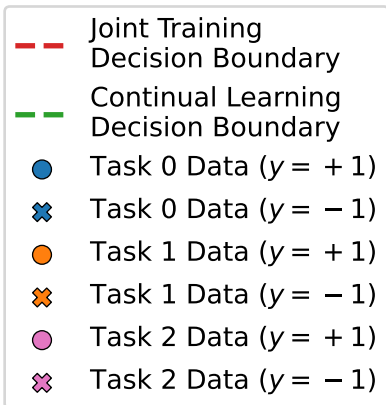

Supplement: supplementary_material [file attachment]

Loss: Continually learned model

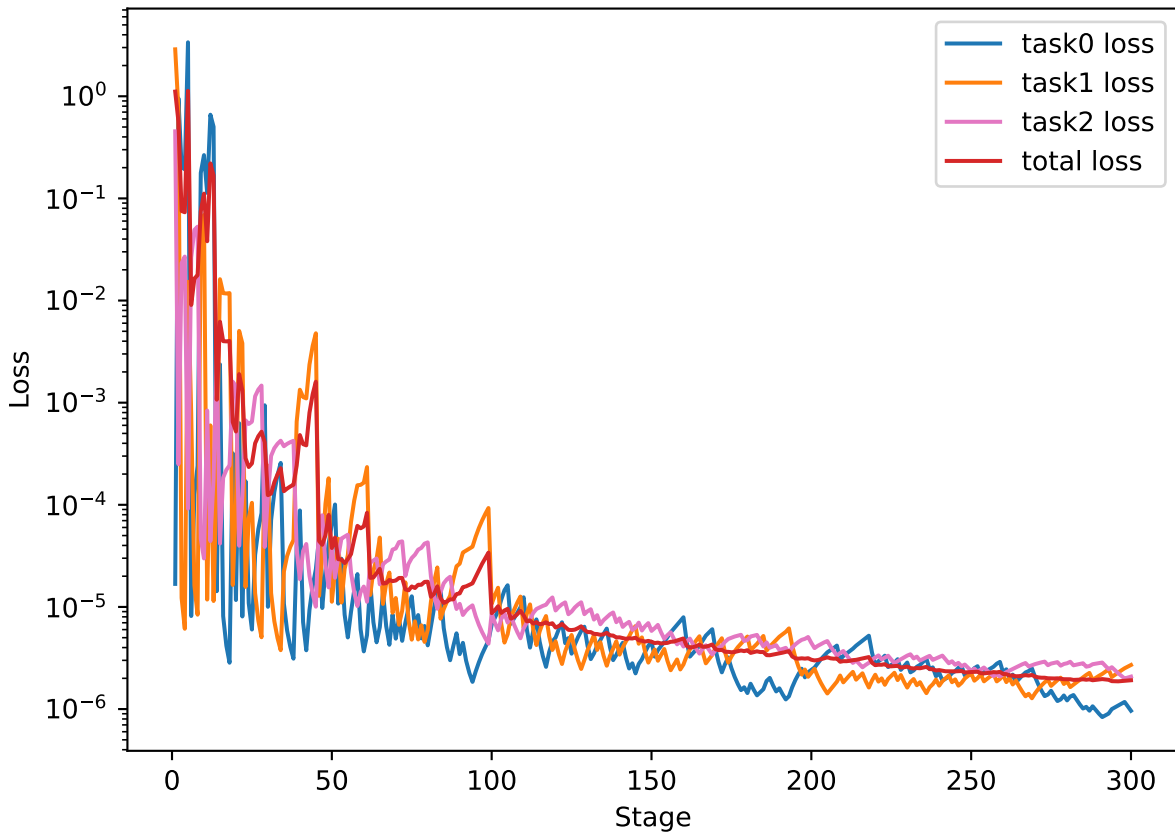

Supplement: supplementary_material [file attachment]

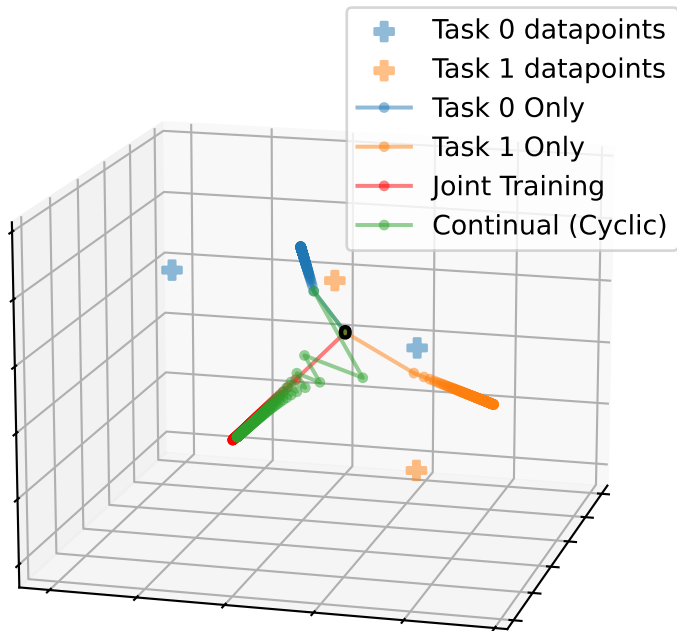

Supplement: supplementary_material [file attachment]

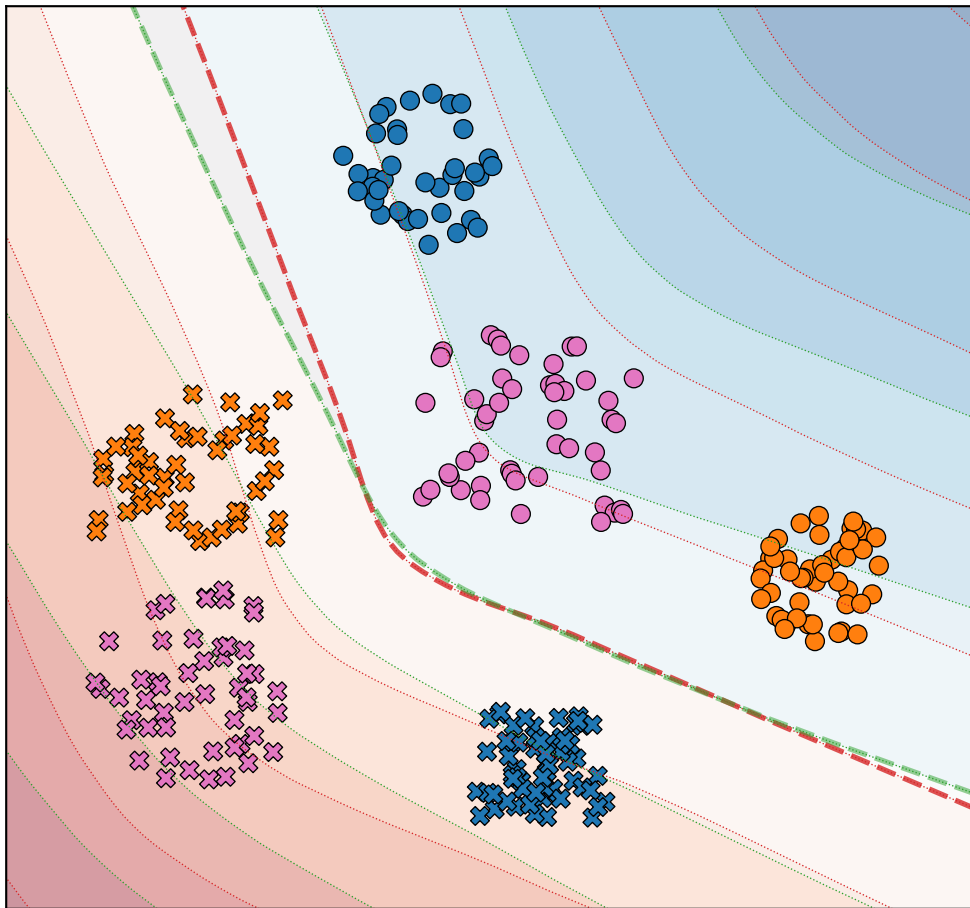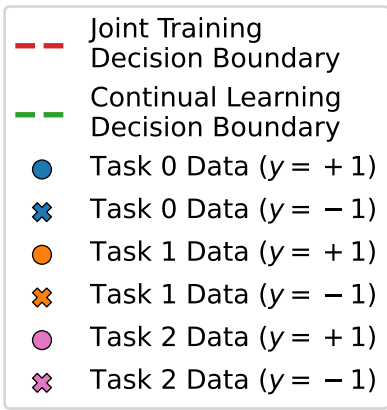

Supplement: supplementary_material [file attachment]

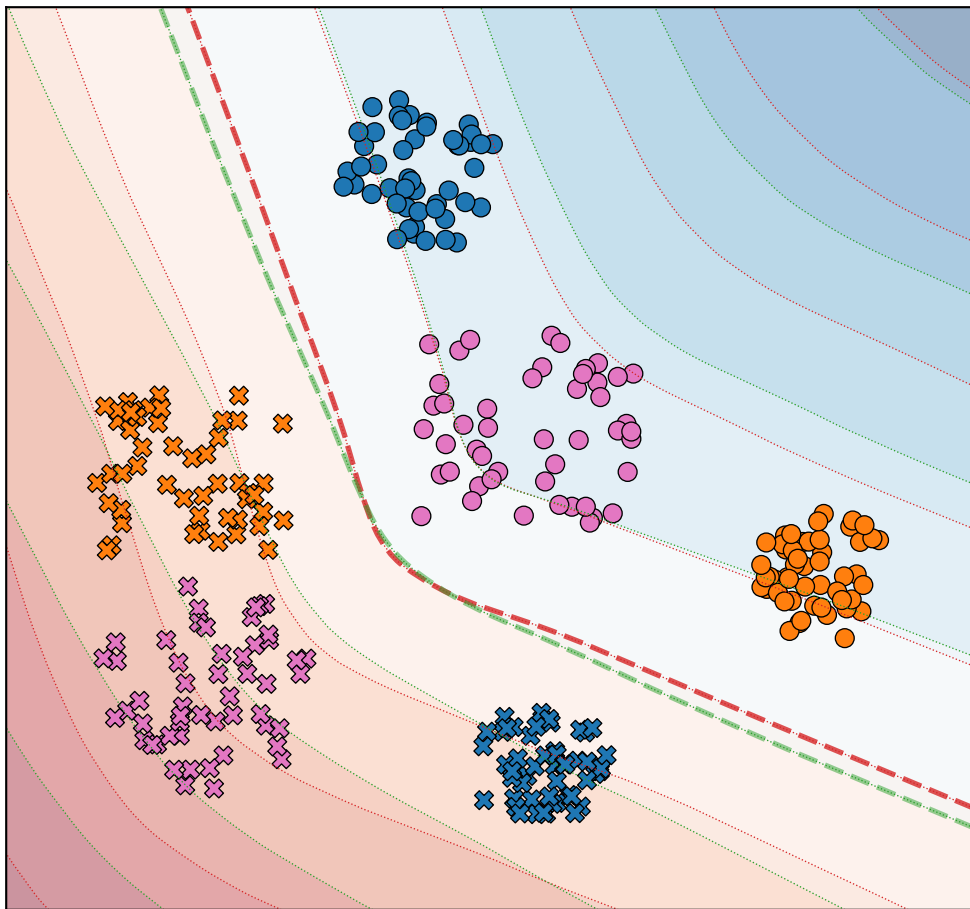

Supplement: supplementary_material [file attachment]

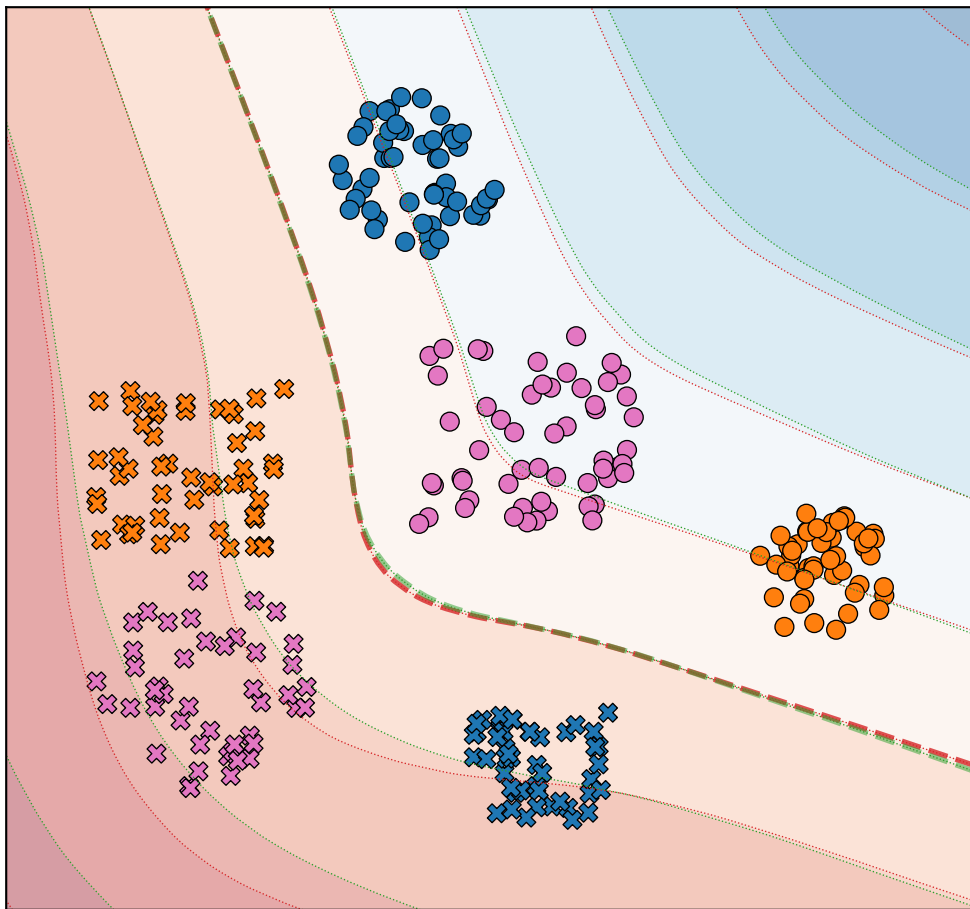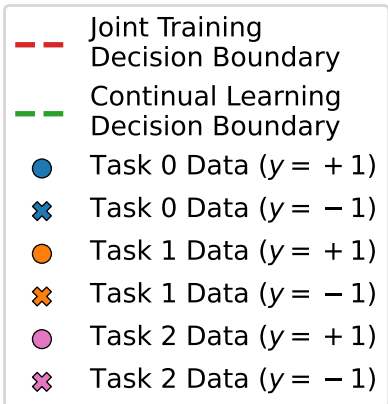

Supplement: supplementary_material [file attachment]

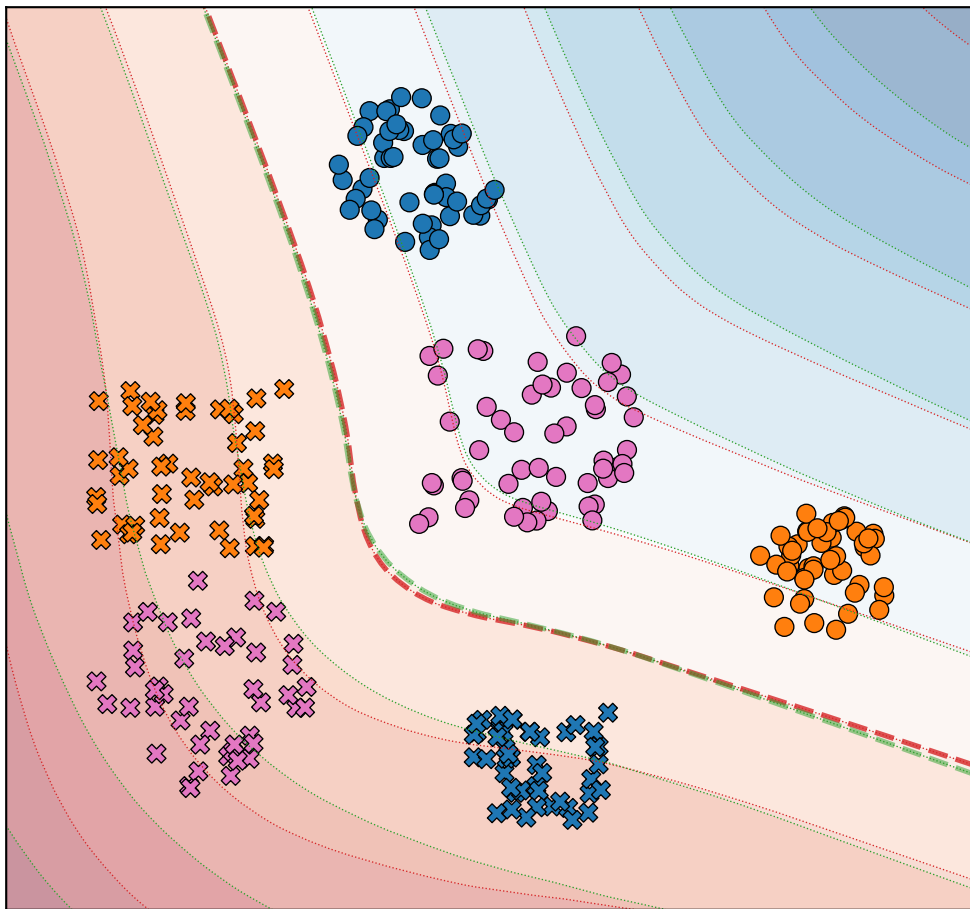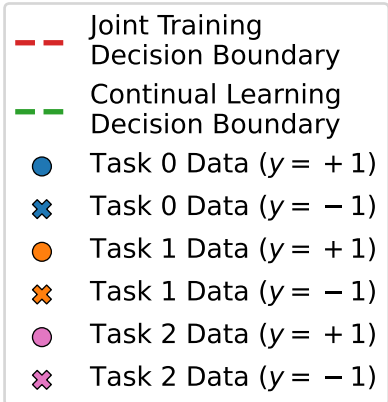

Supplement: supplementary_material [file attachment]

Loss: Jointly learned model

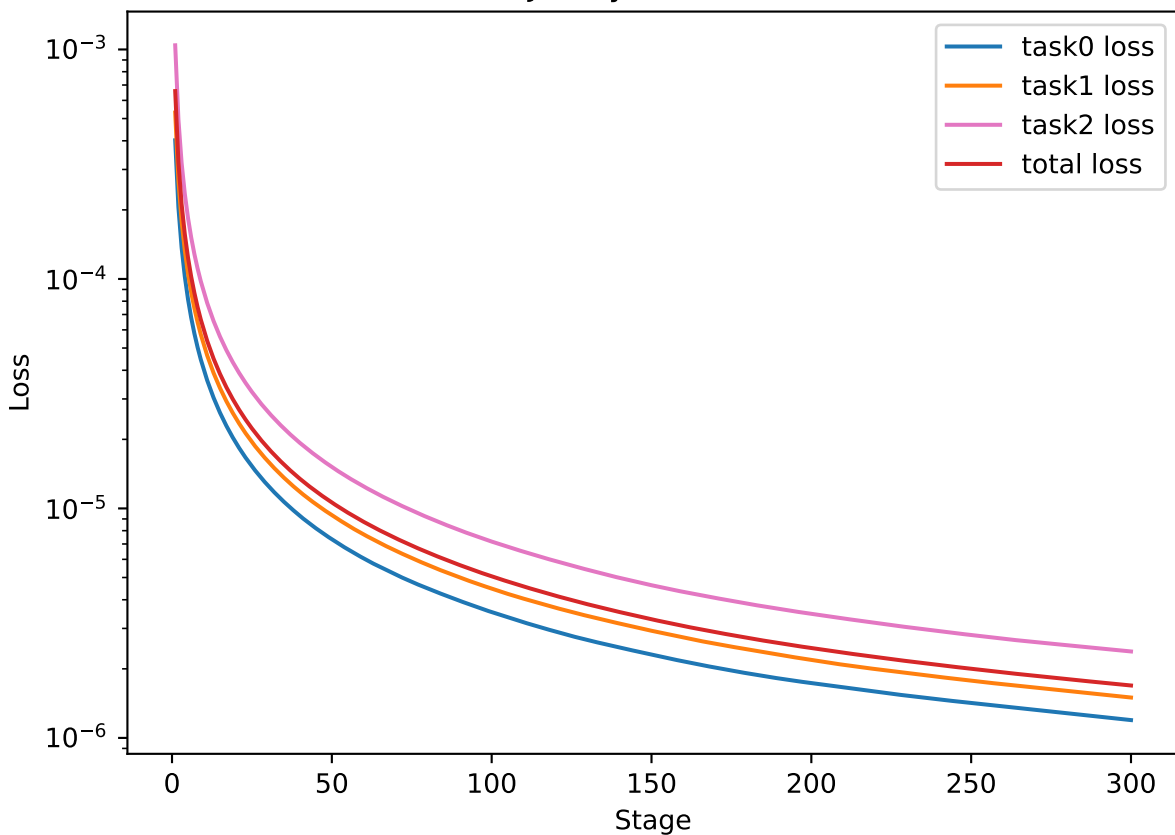

Supplement: supplementary_material [file attachment]

Loss: Continually learned model

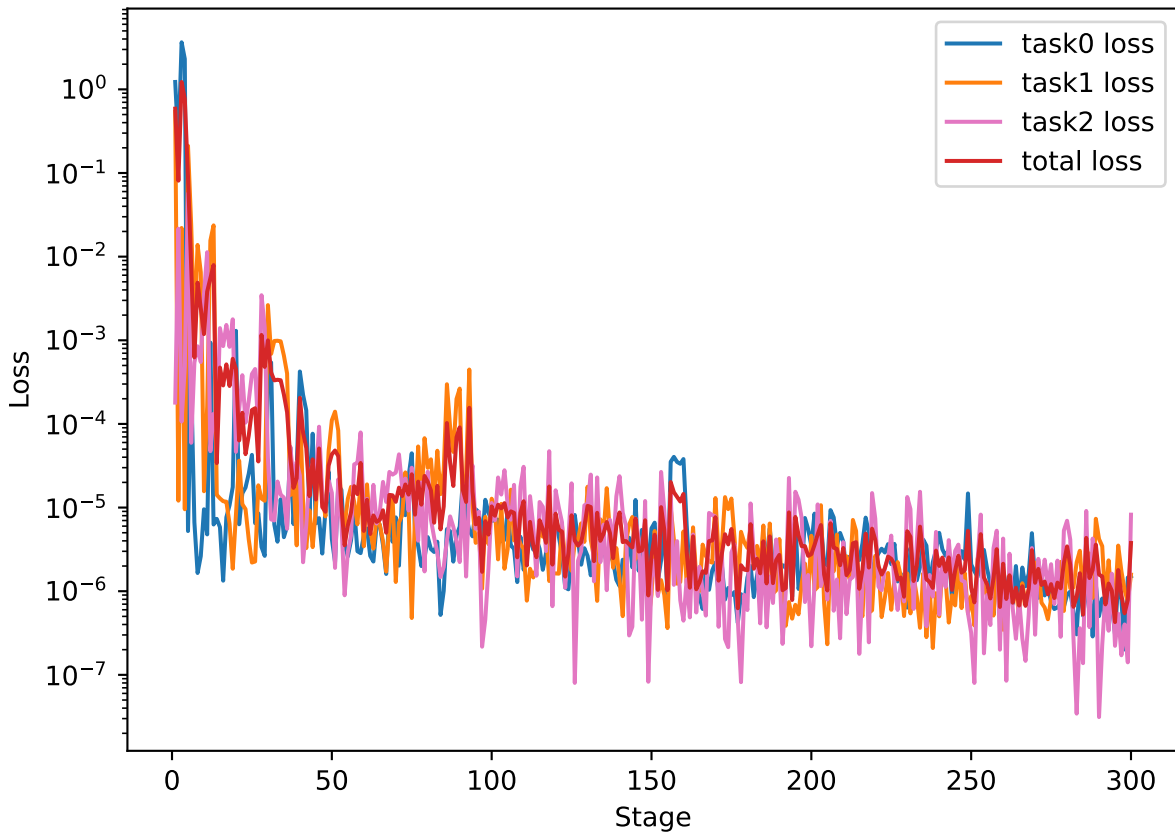

Supplement: supplementary_material [file attachment]

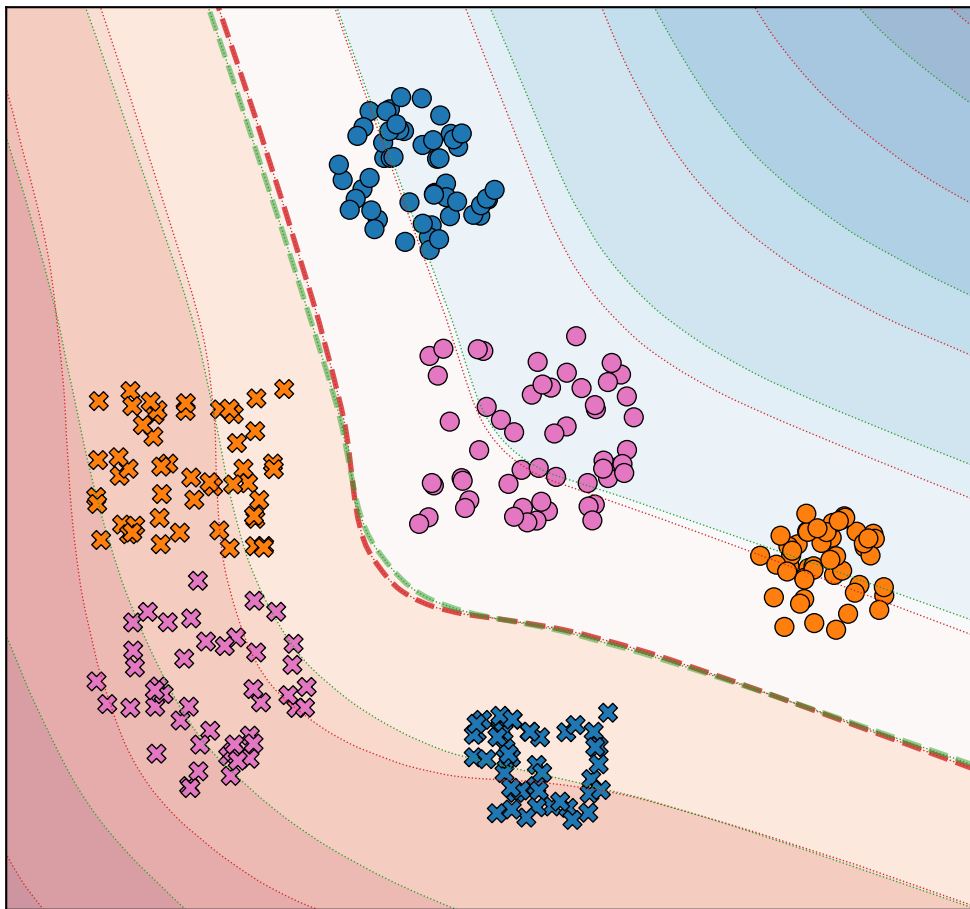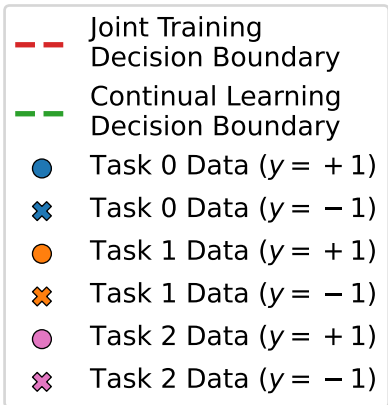

Supplement: supplementary_material [file attachment]

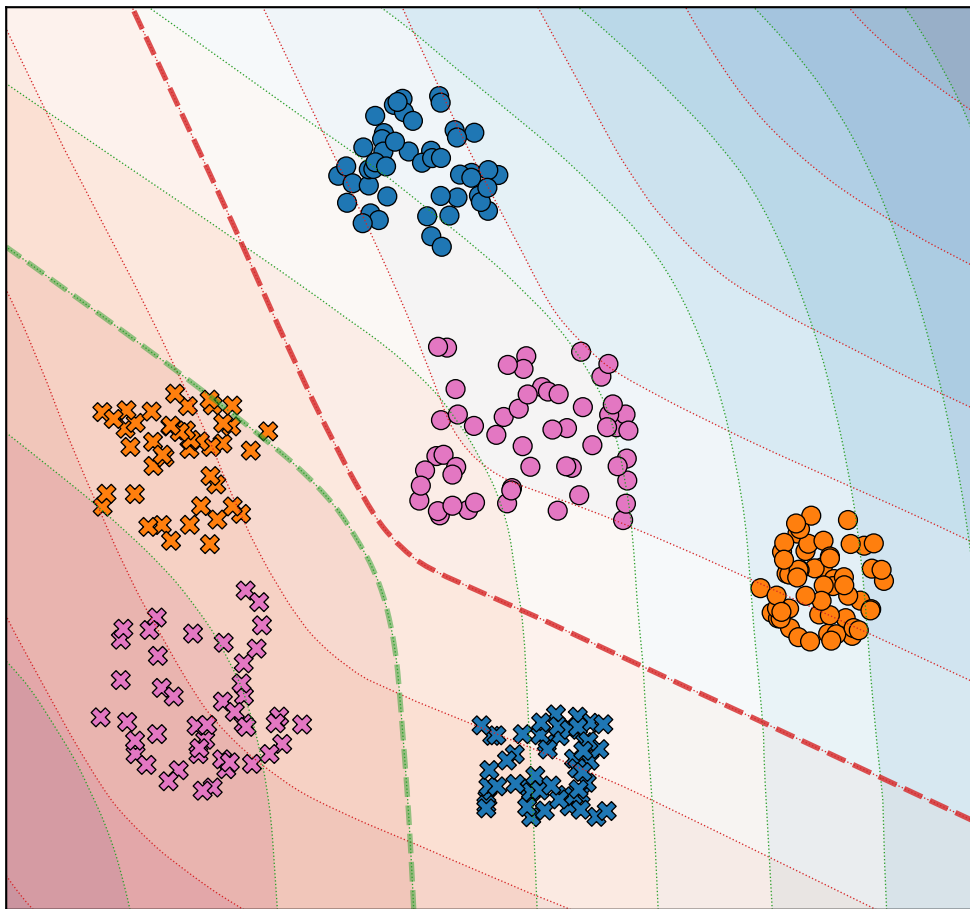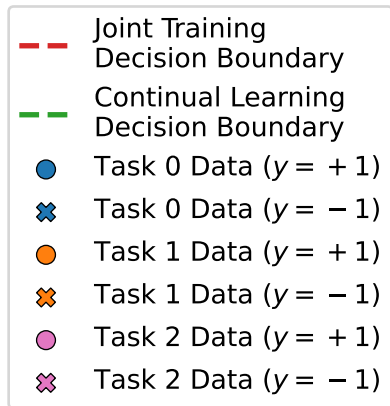

Supplement: supplementary_material [file attachment]

Loss: Jointly learned model

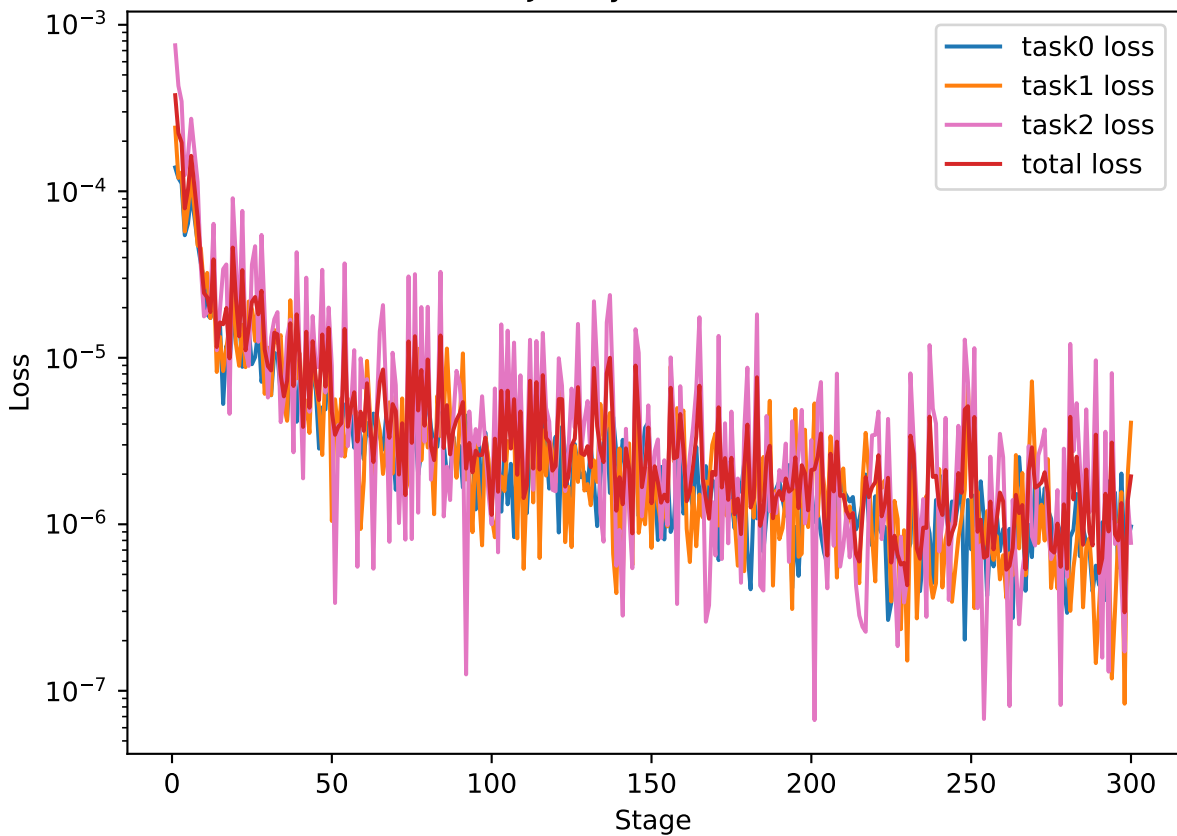

Supplement: supplementary_material [file attachment]

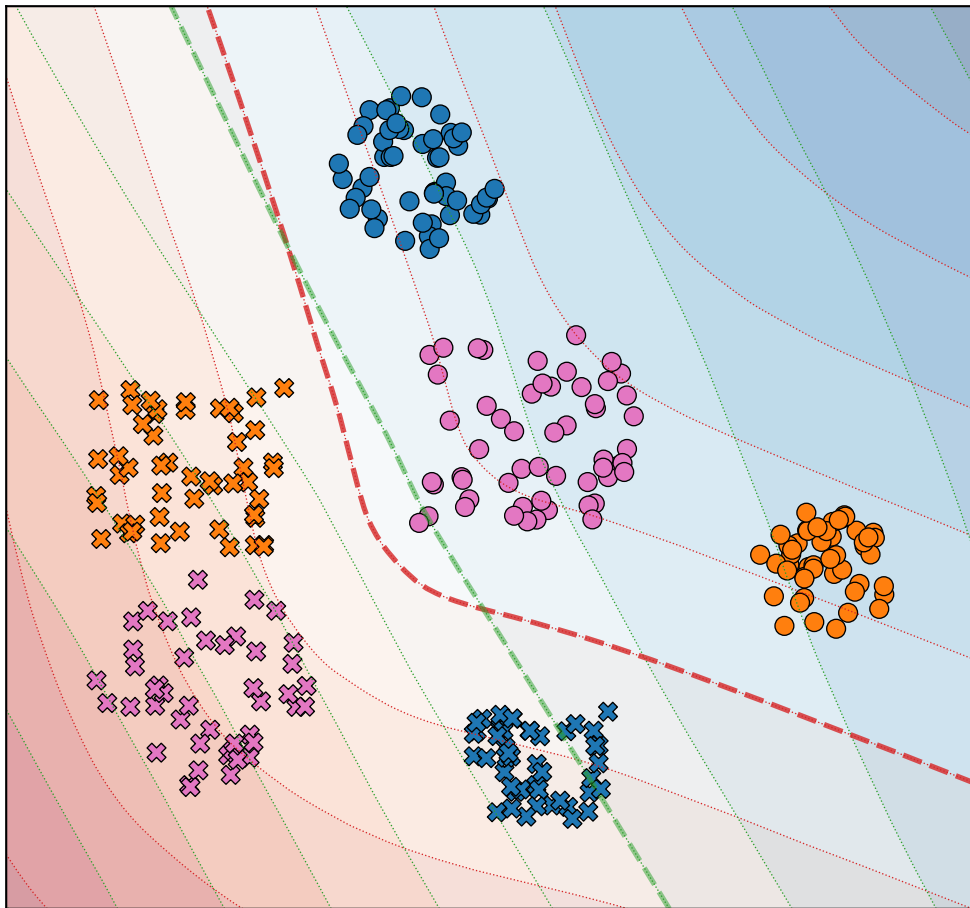

Supplement: supplementary_material [file attachment]

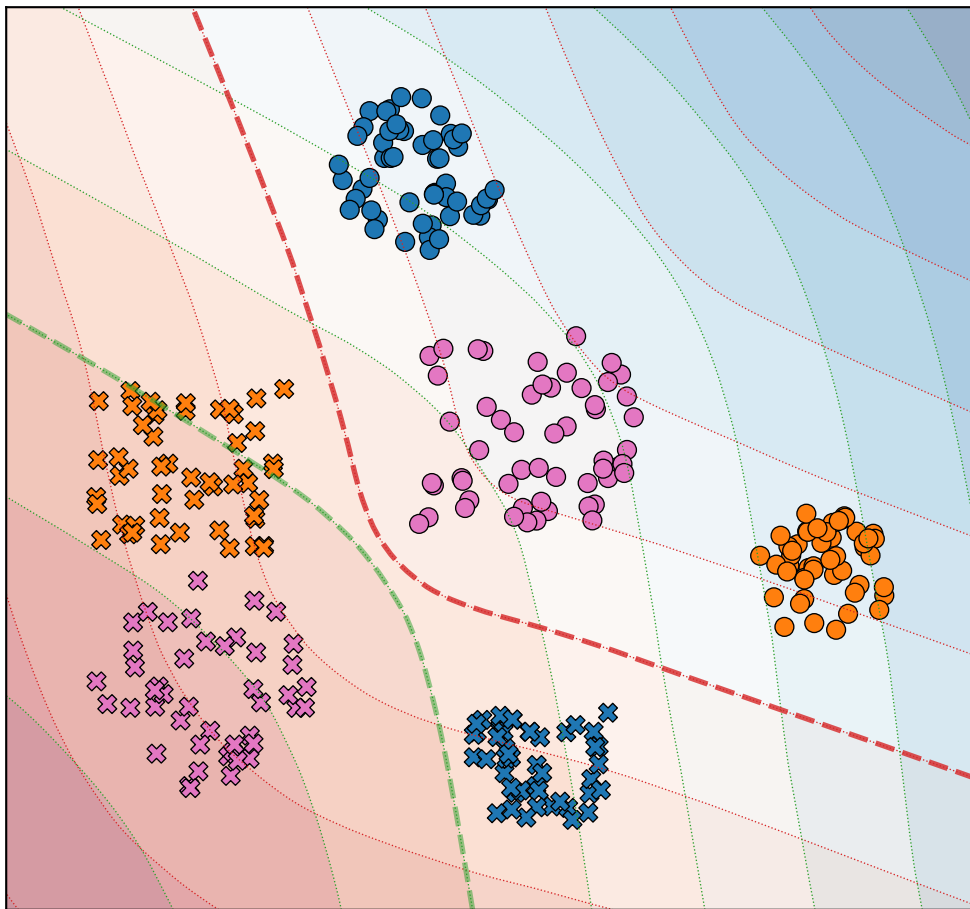

Supplement: supplementary_material [file attachment]

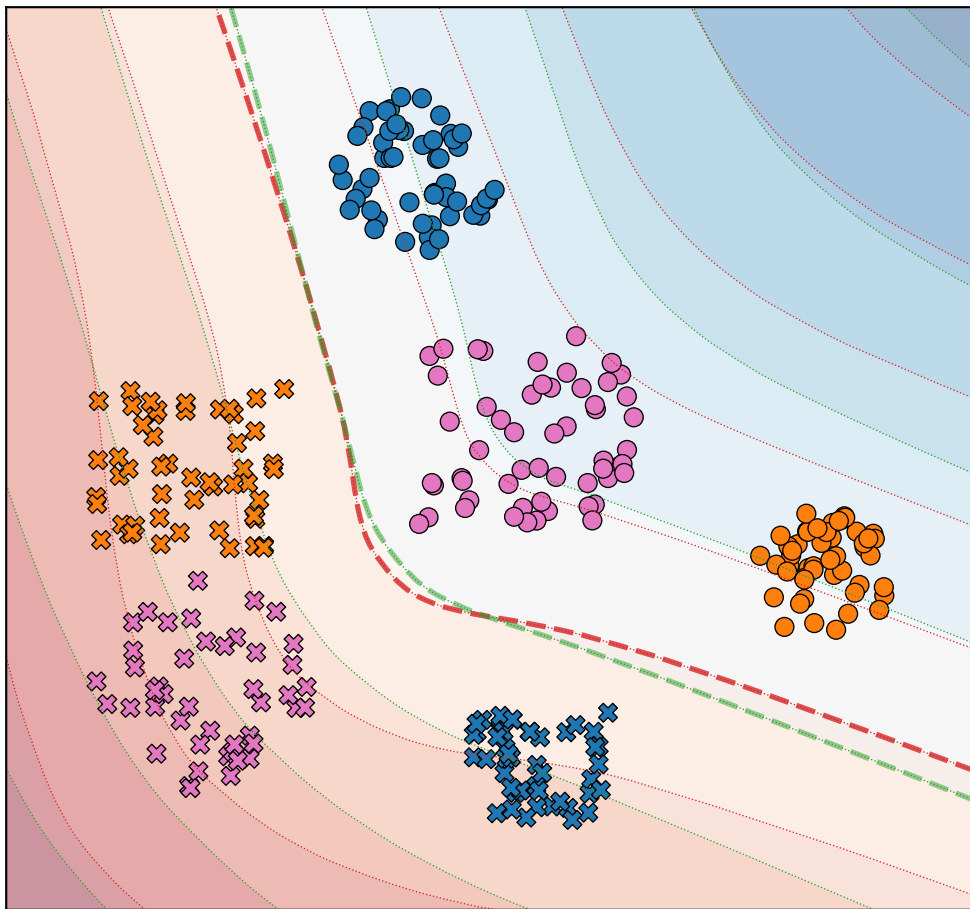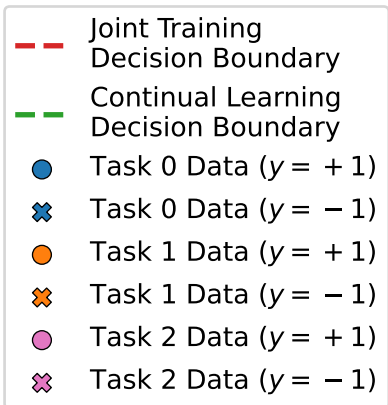

Supplement: supplementary_material [file attachment]

Sine Angle(  $= \sqrt{1 - \text{cossim}^2}$  )  
between Linear Model vs. Joint Max-Margin

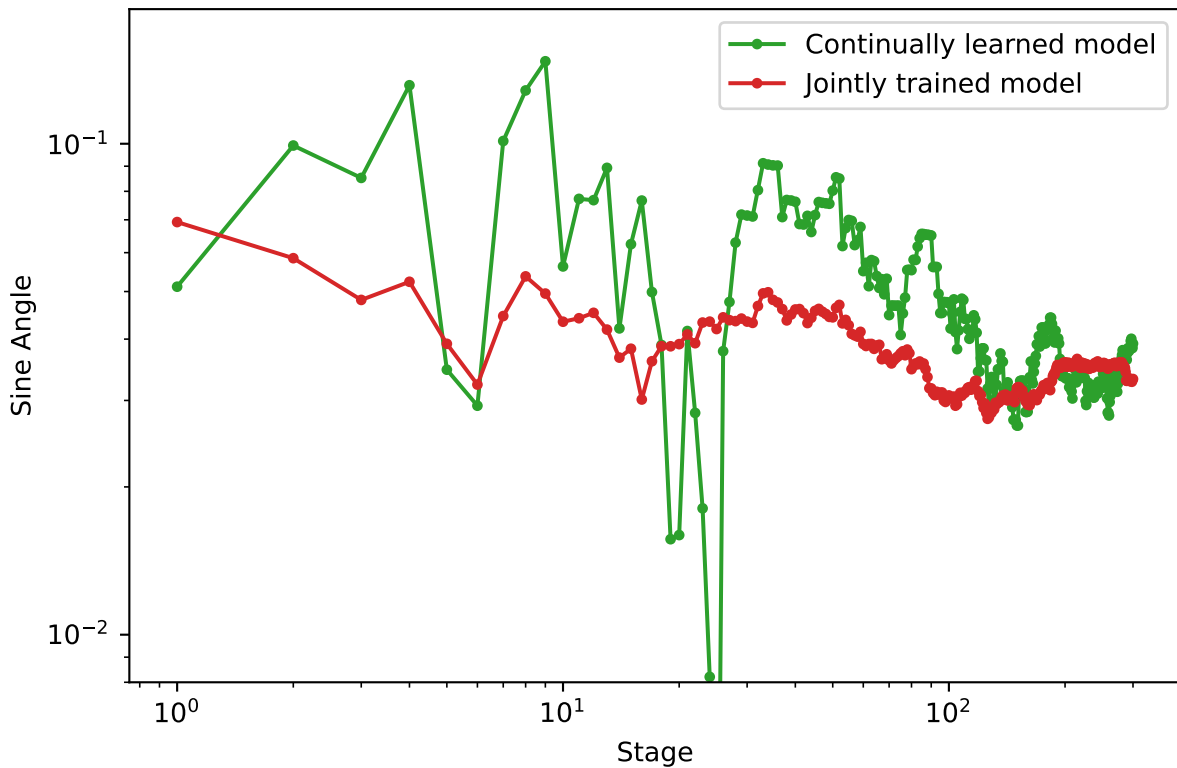

Supplement: supplementary_material [file attachment]

Loss: Jointly learned model

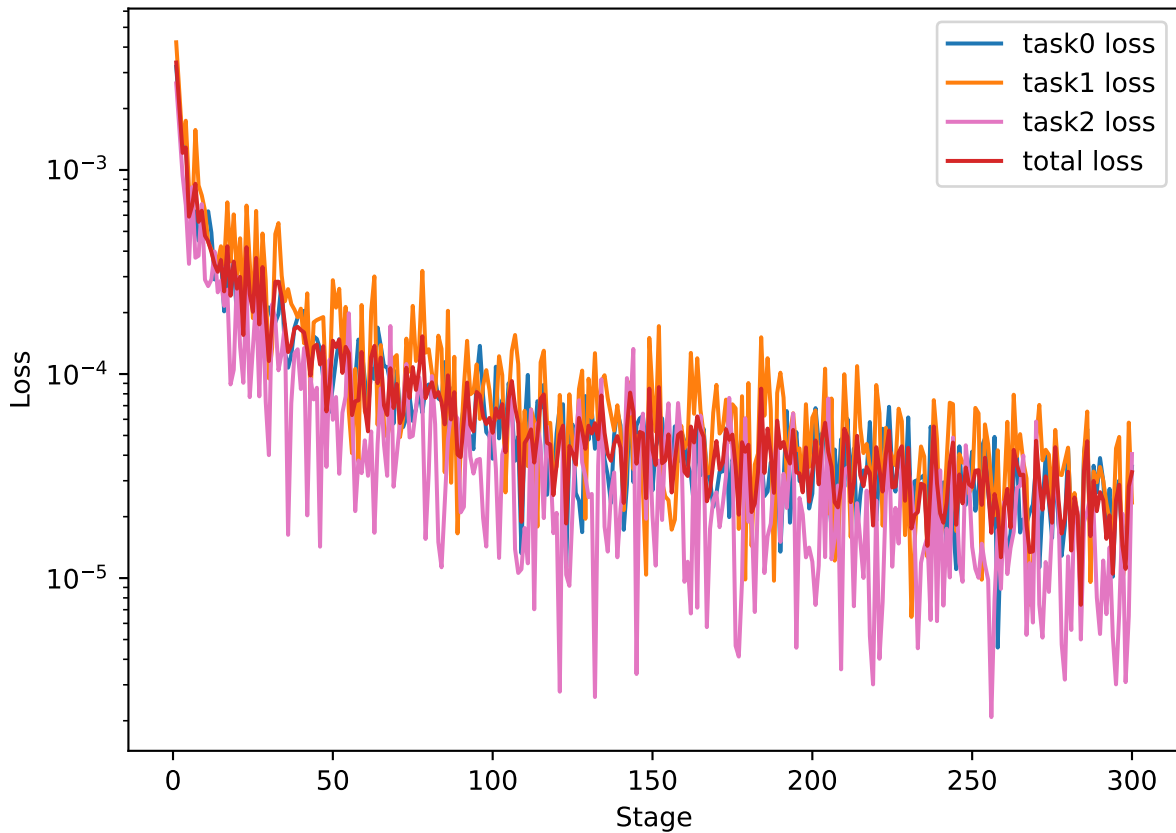

Supplement: supplementary_material [file attachment]

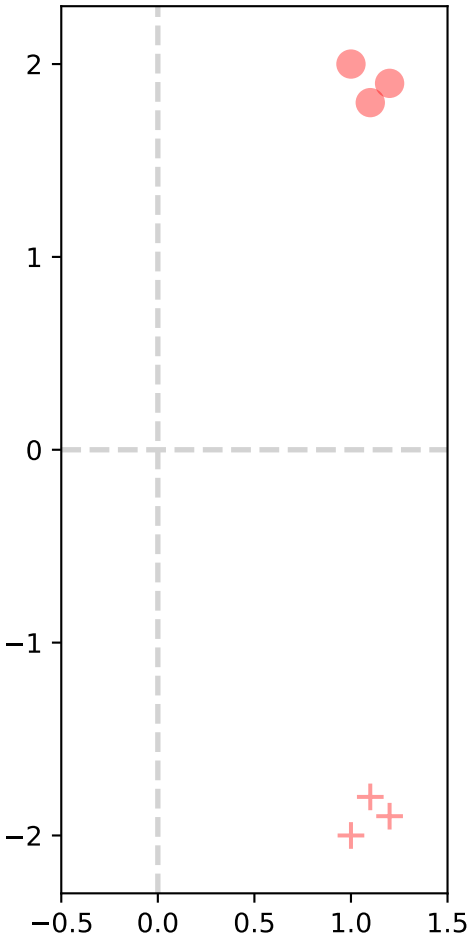

Supplement: supplementary_material [file attachment]

Loss: Continually learned model

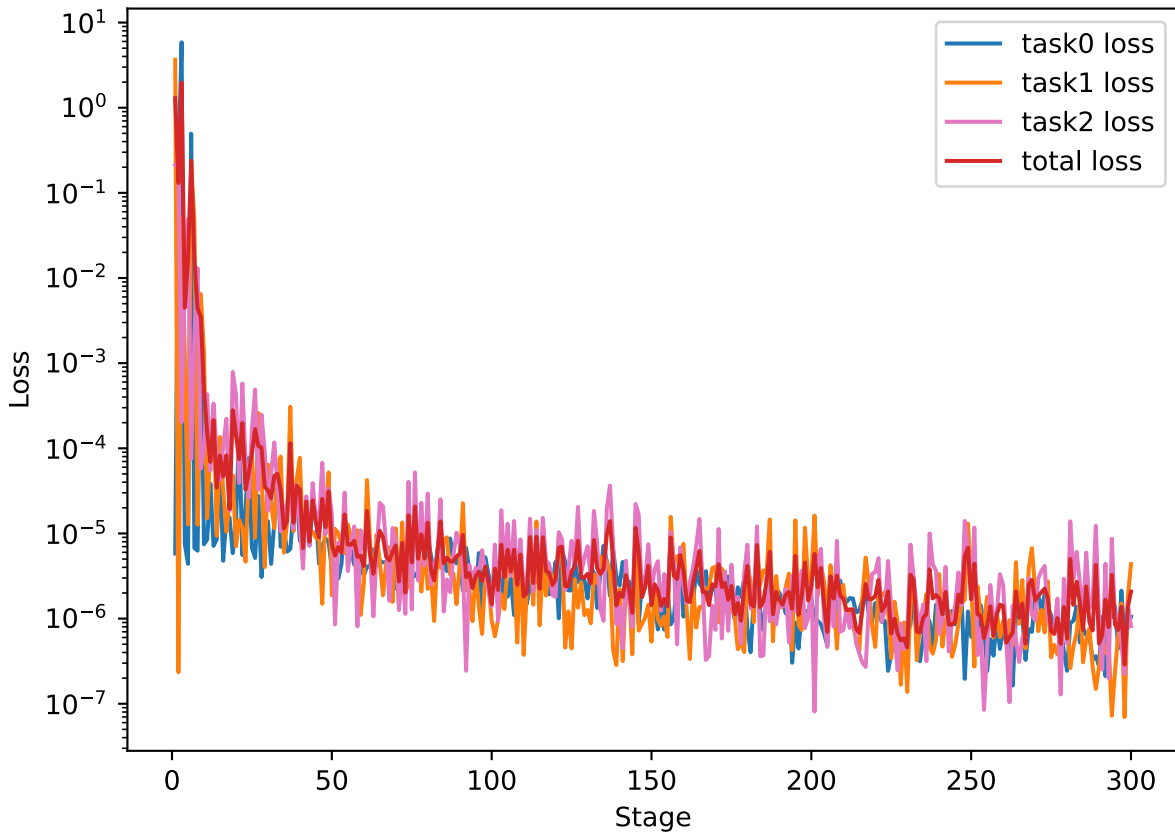

Supplement: supplementary_material [file attachment]

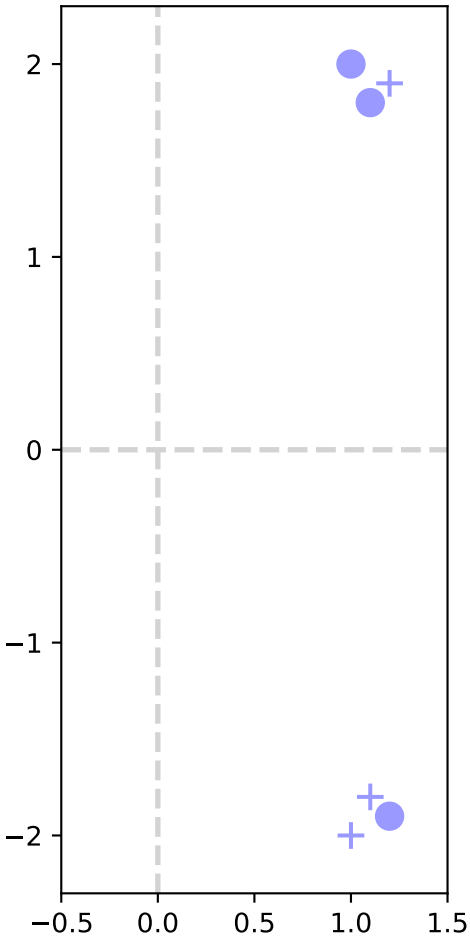

Supplement: supplementary_material [file attachment]

Loss: Jointly learned model

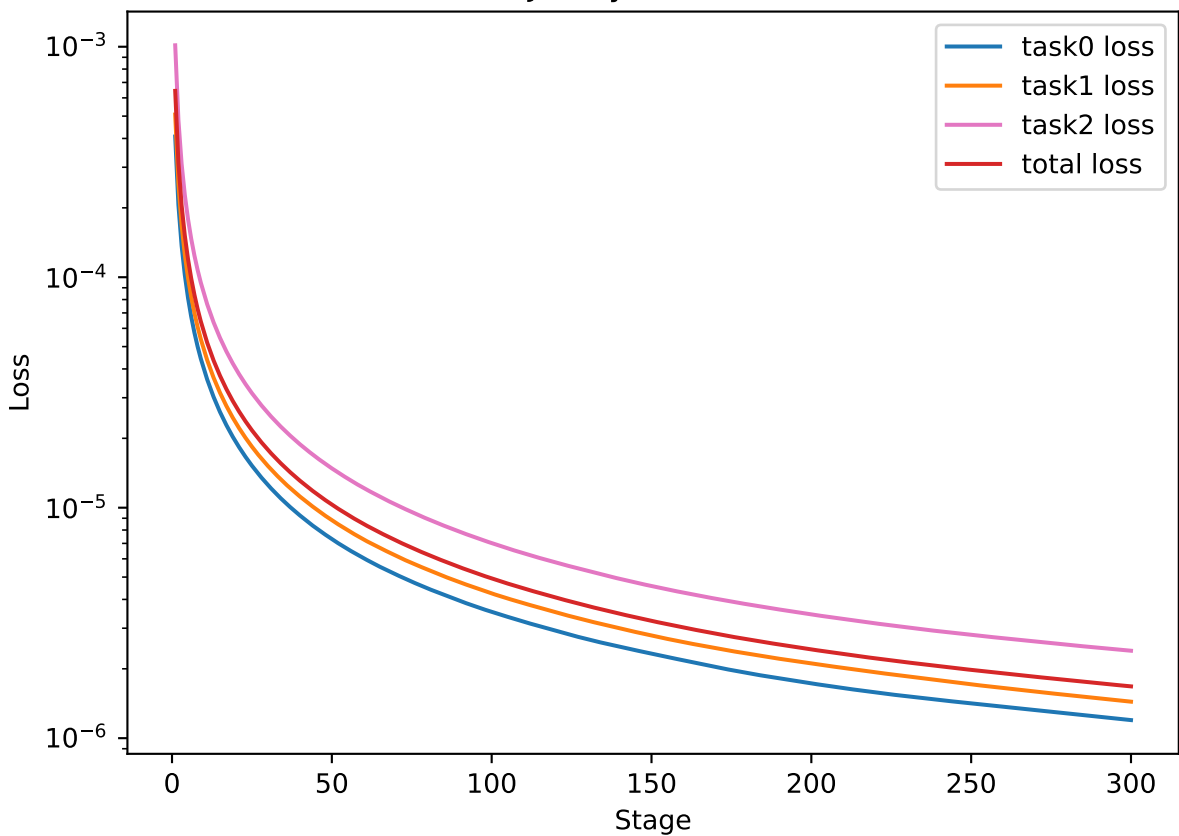

Supplement: supplementary_material [file attachment]

Loss: Continually learned model

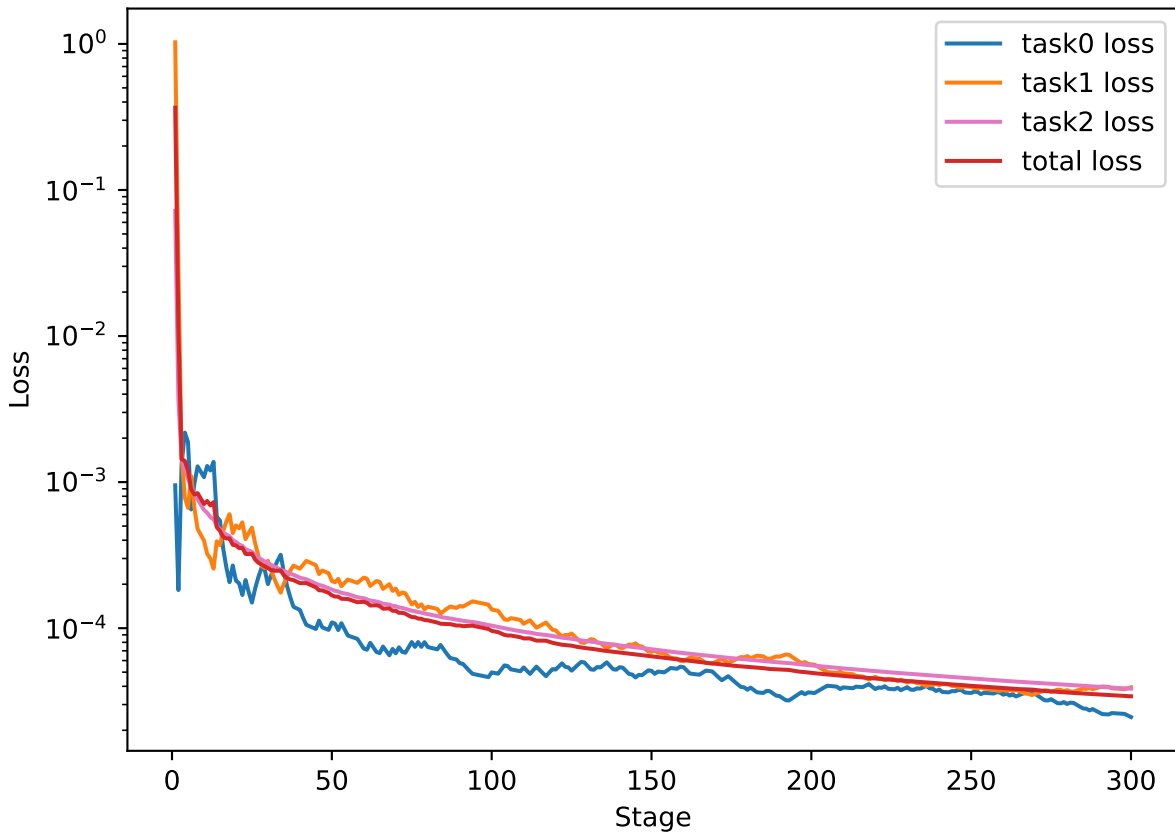

Supplement: supplementary_material [file attachment]

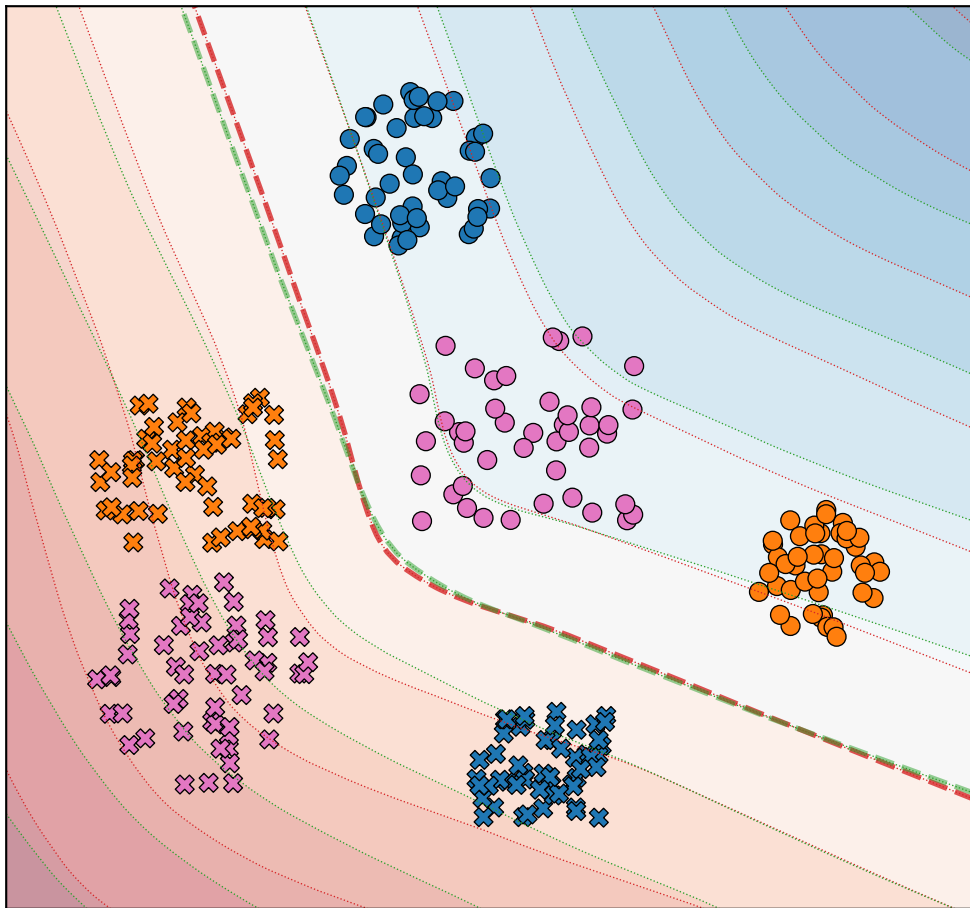

Supplement: supplementary_material [file attachment]

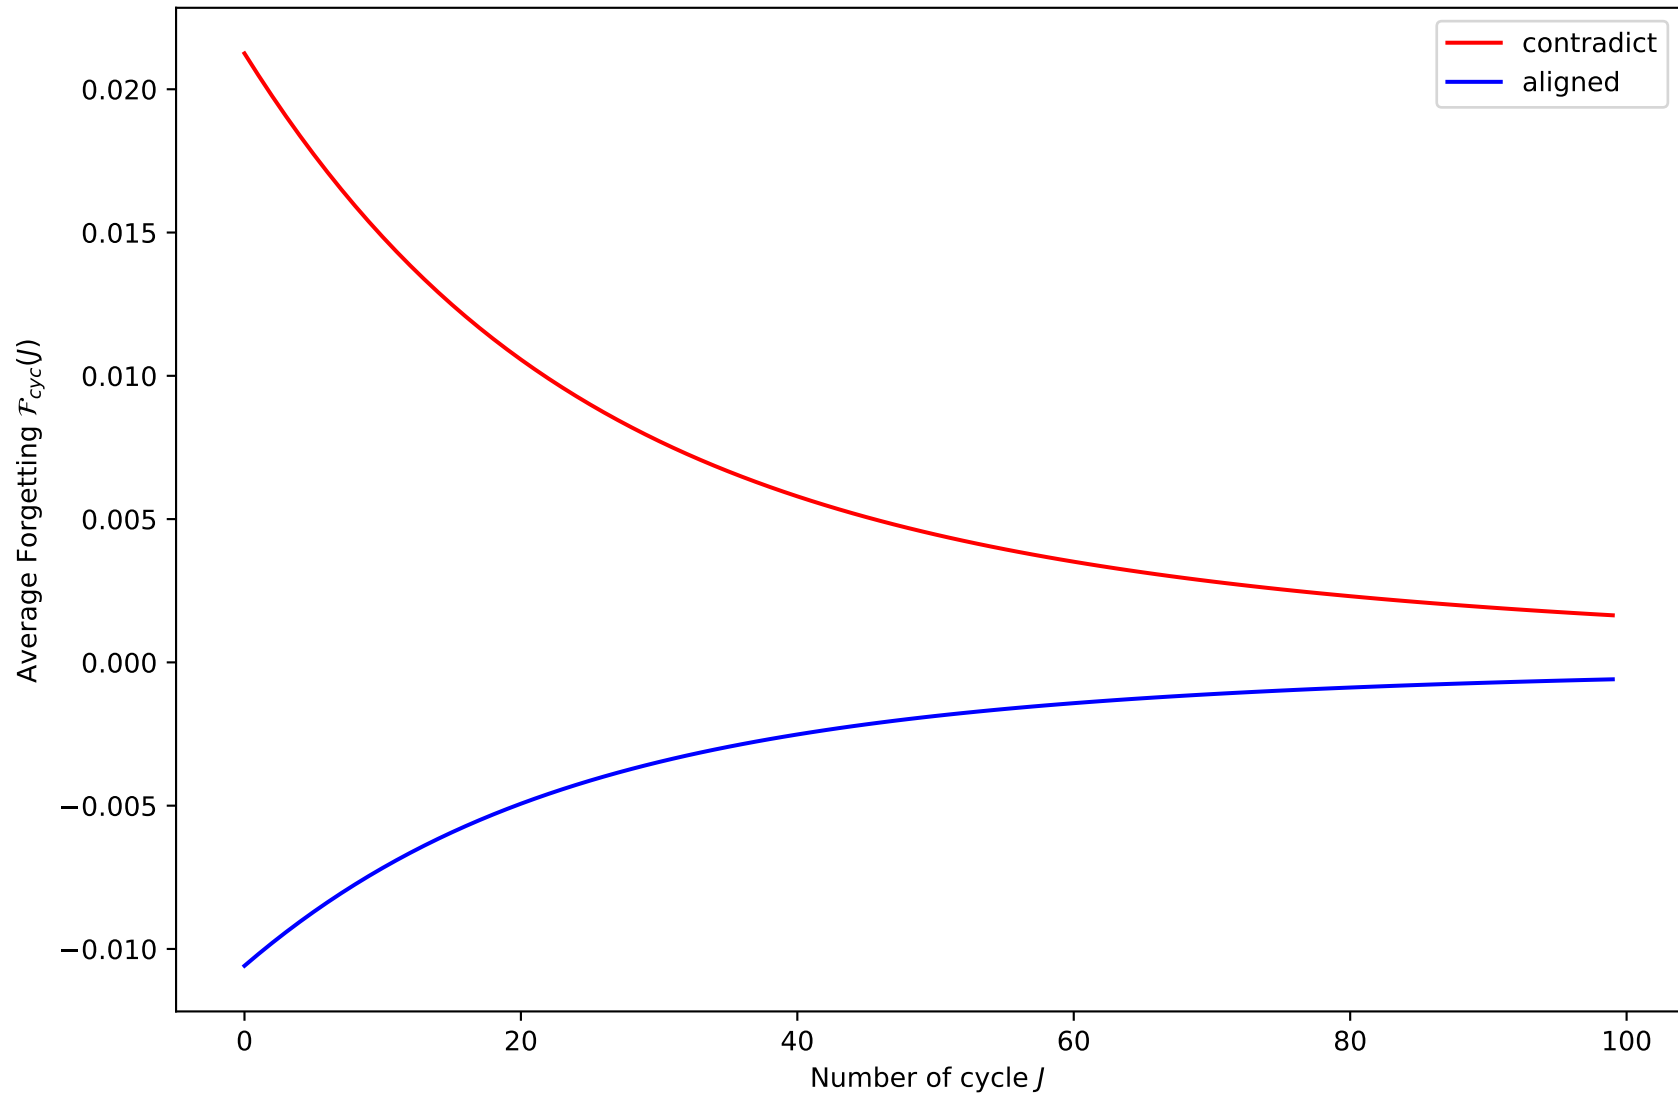

Supplement: supplementary_material [file attachment]

Loss: Jointly learned model

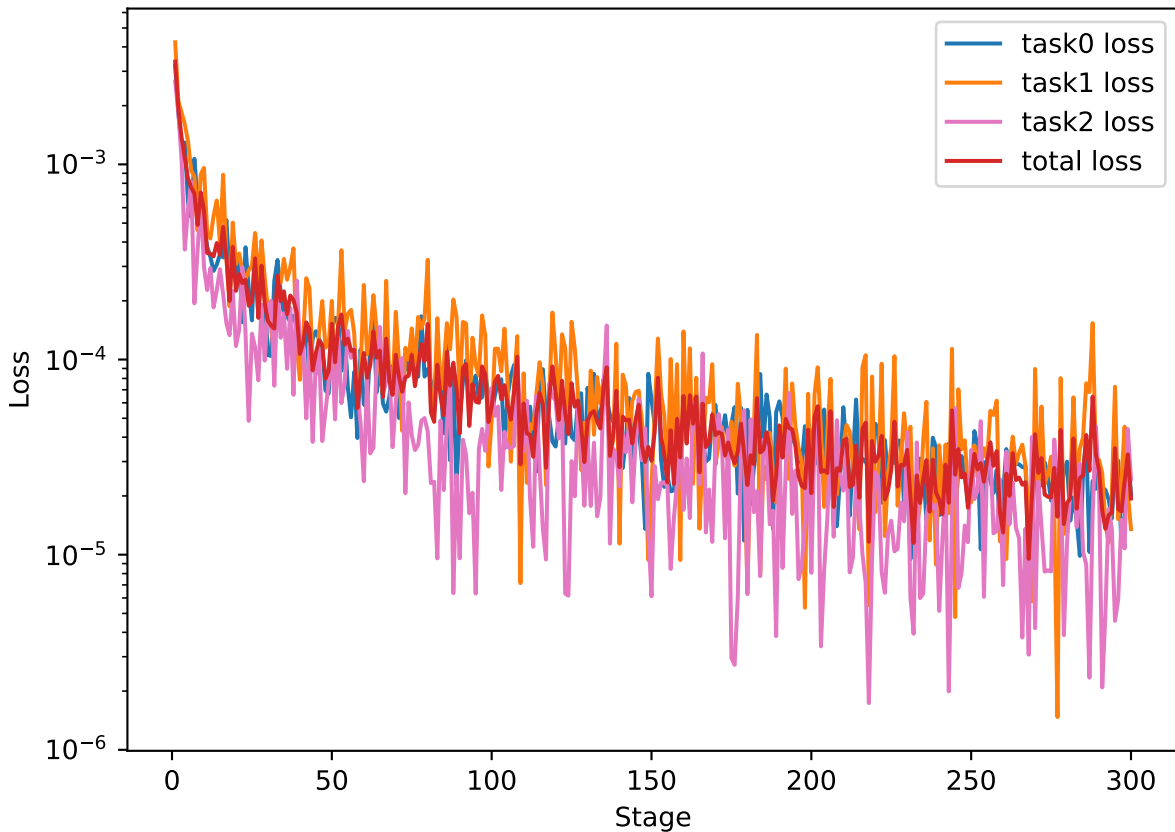

Supplement: supplementary_material [file attachment]

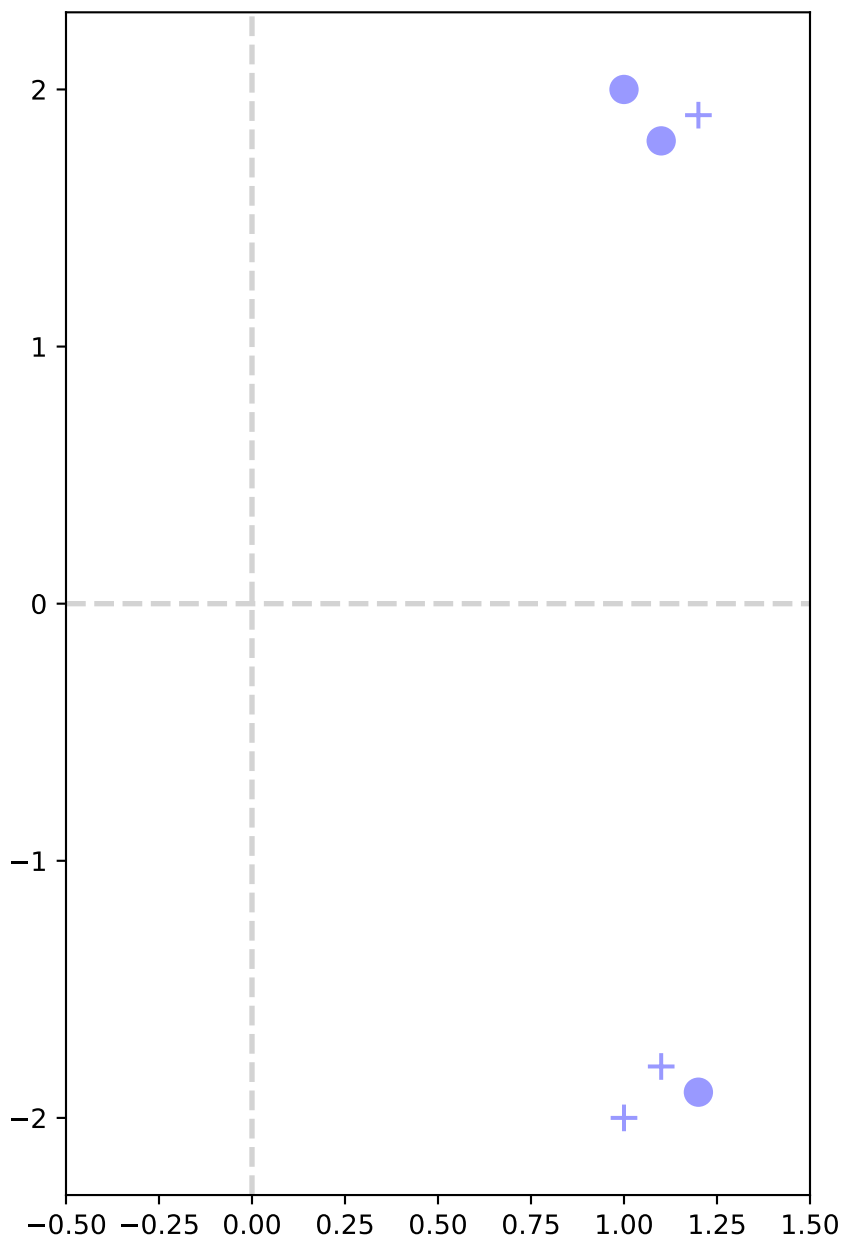

Supplement: supplementary_material [file attachment]

Loss: Continually learned model

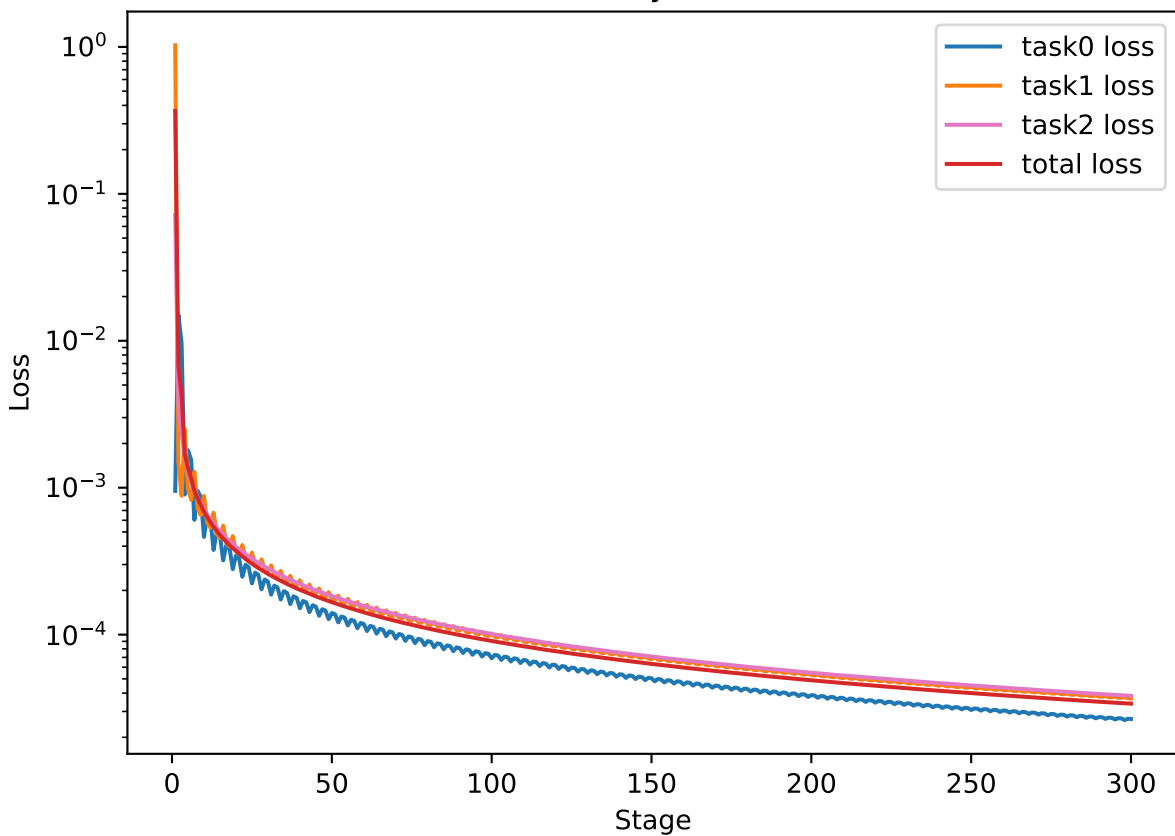

Supplement: supplementary_material [file attachment]

Loss: Jointly learned model

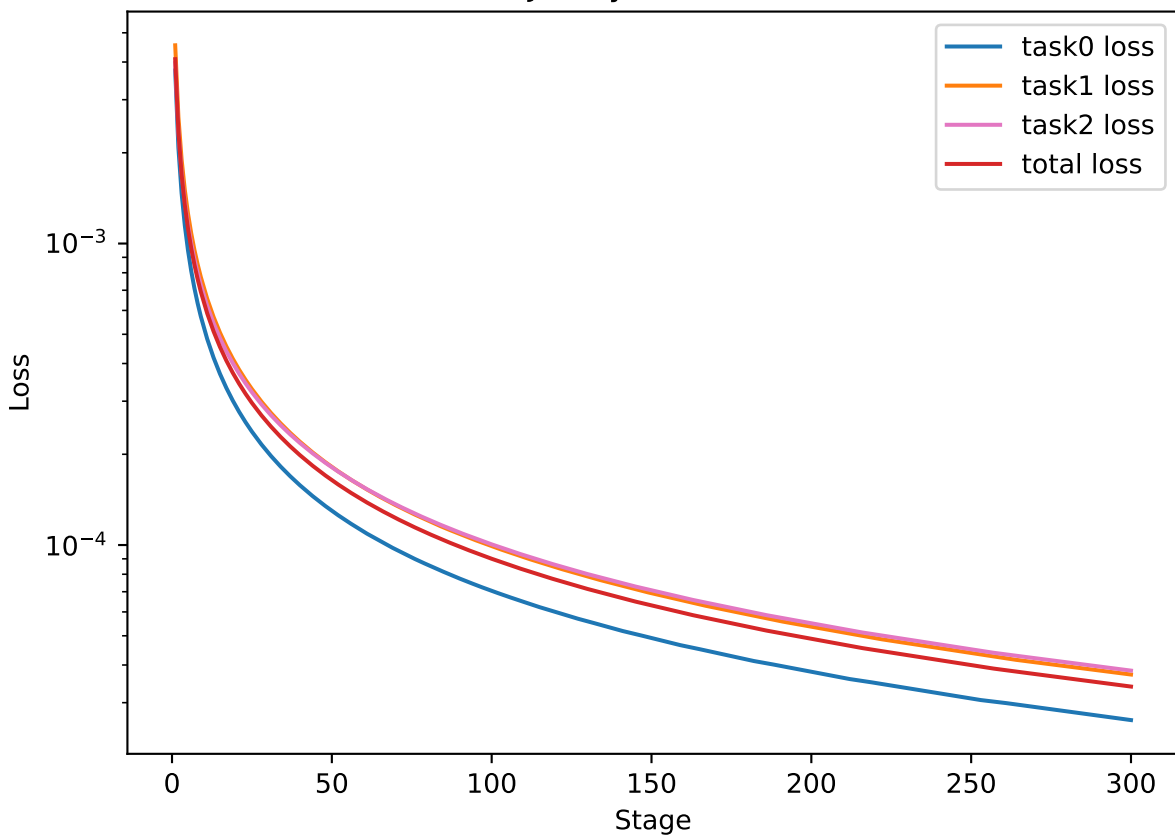

Supplement: supplementary_material [file attachment]

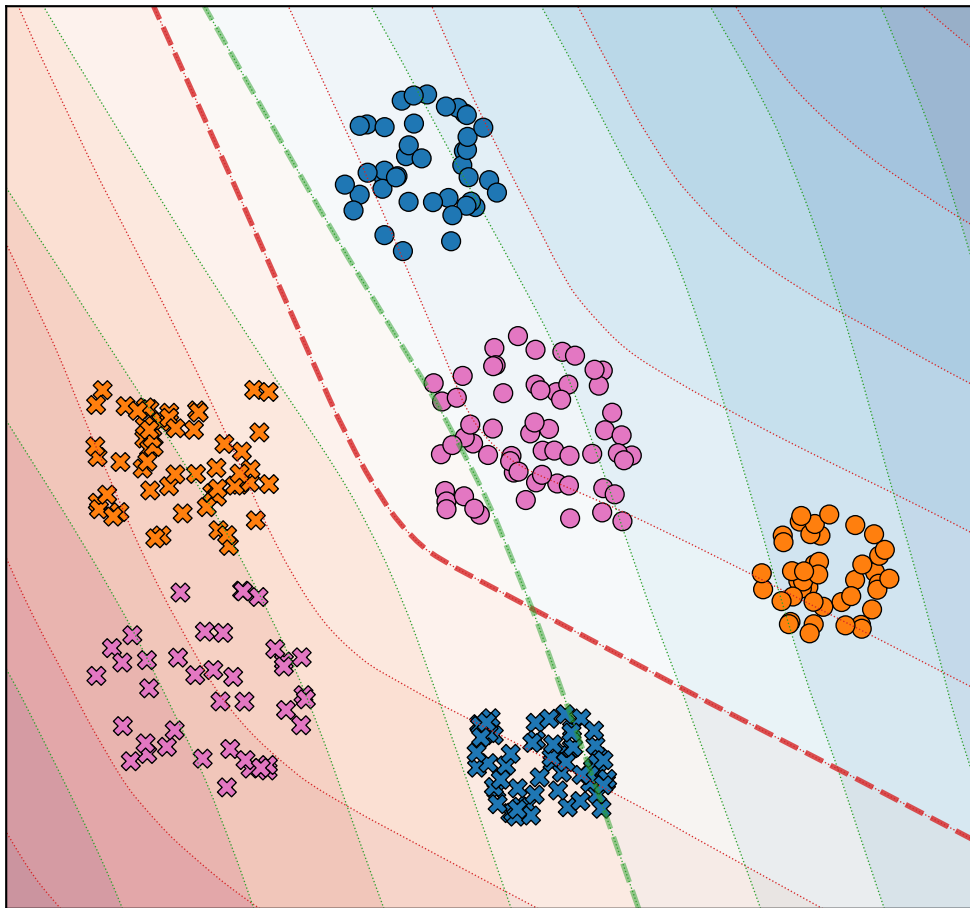

Supplement: supplementary_material [file attachment]

Sine Angle(  $= \sqrt{1 - \text{cossim}^2}$  )  
between Linear Model vs. Joint Max-Margin

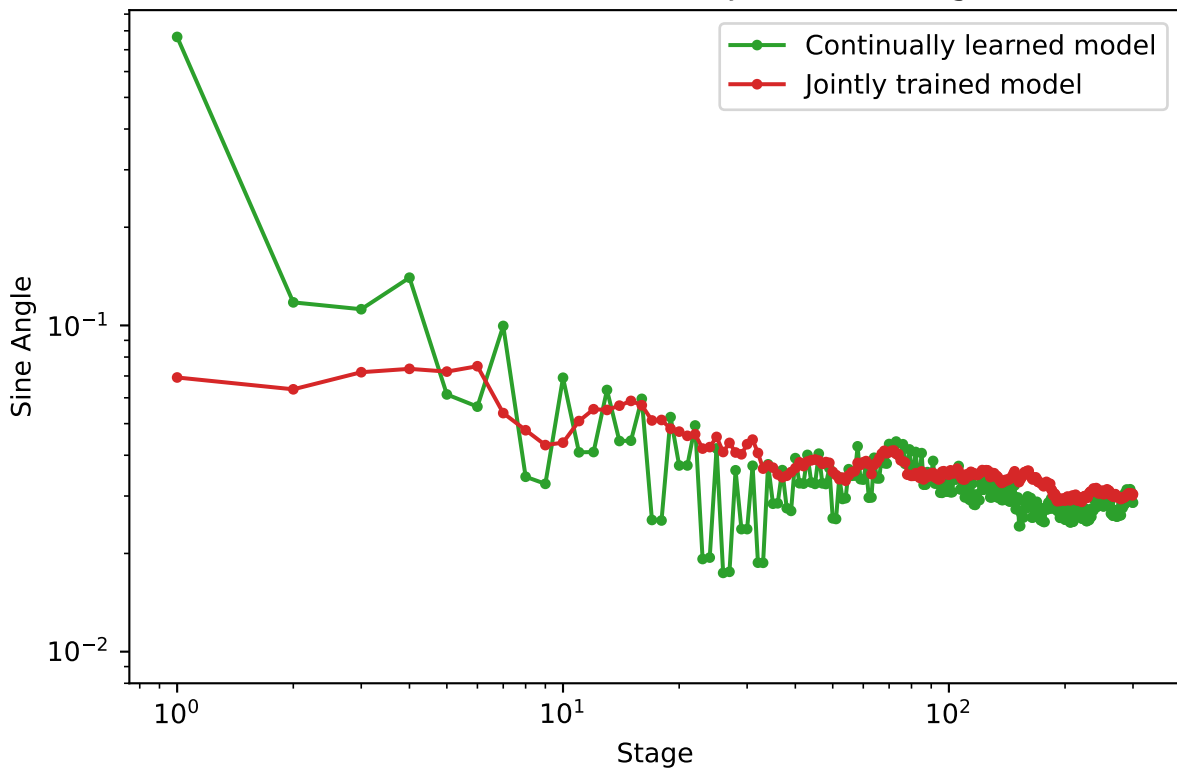

Supplement: supplementary_material [file attachment]

Loss: Continually learned model

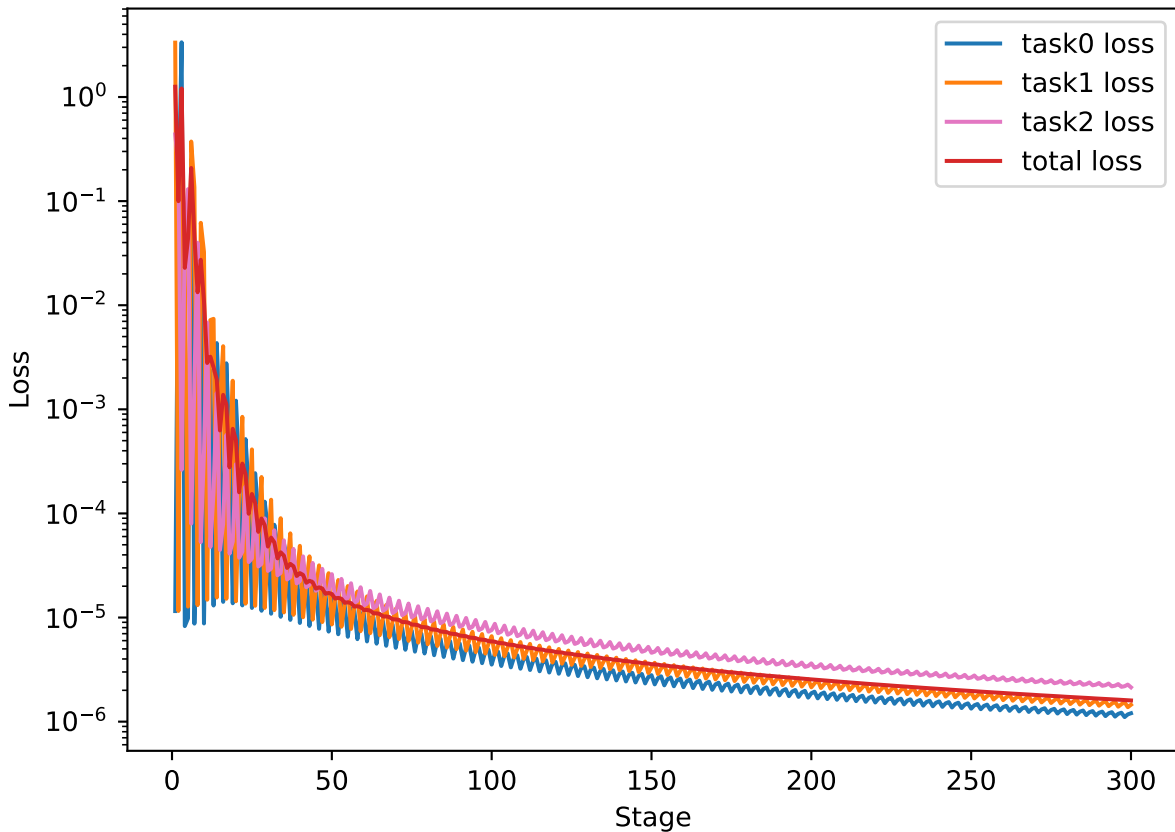

Supplement: supplementary_material [file attachment]

Loss: Continually learned model

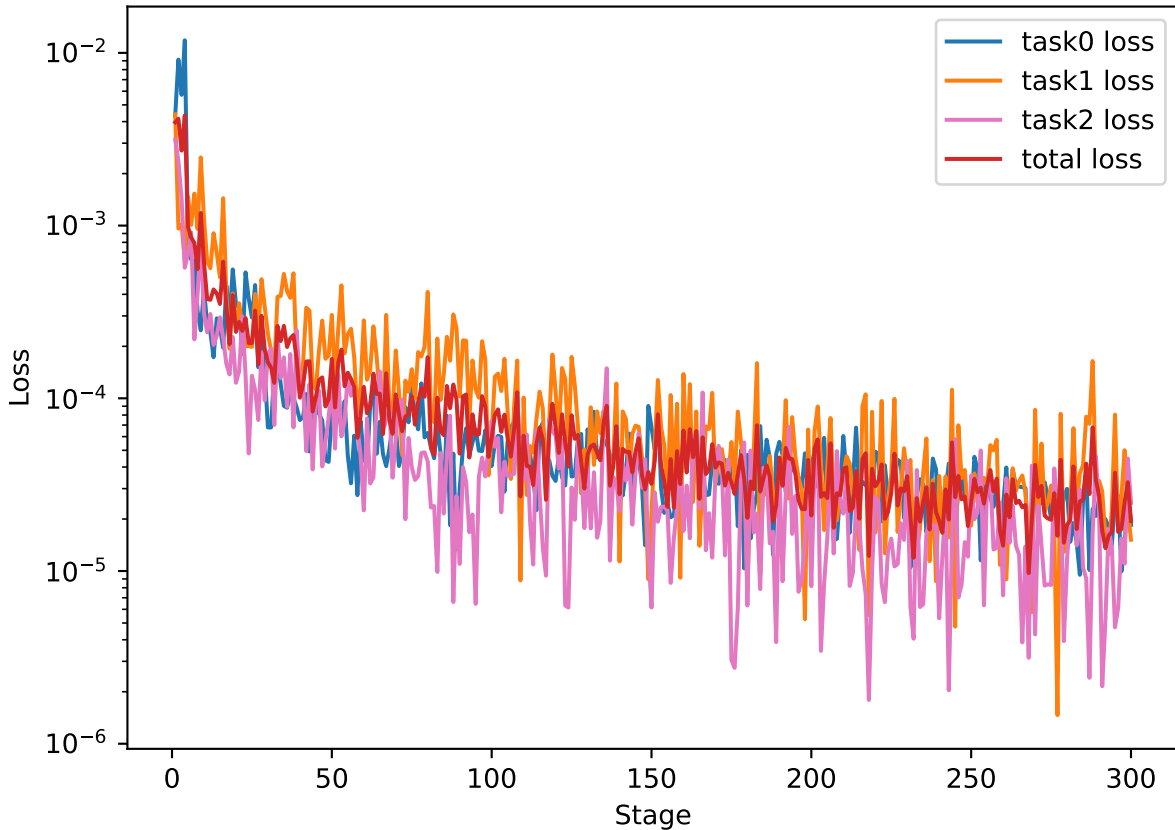

Supplement: supplementary_material [file attachment]

Sine Angle( =  $\sqrt{1 - \text{cossim}^2}$  )  
between Linear Model vs. Joint Max-Margin

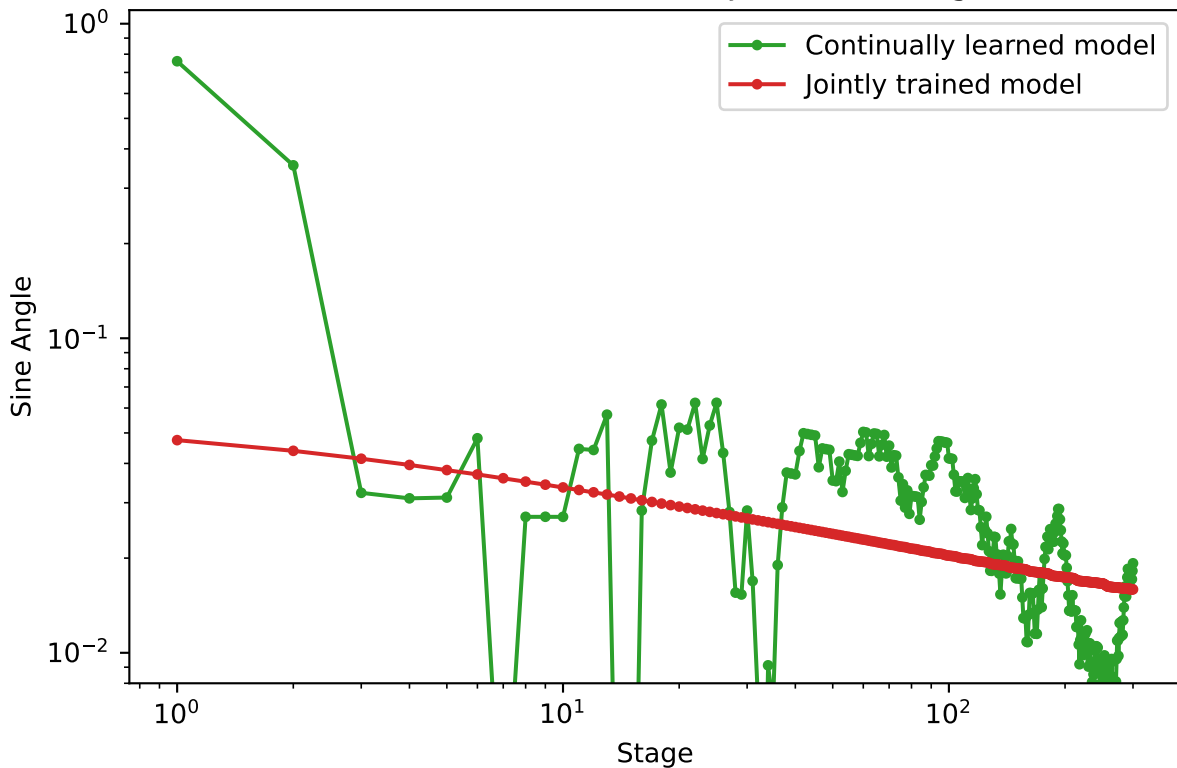

Supplement: supplementary_material [file attachment]

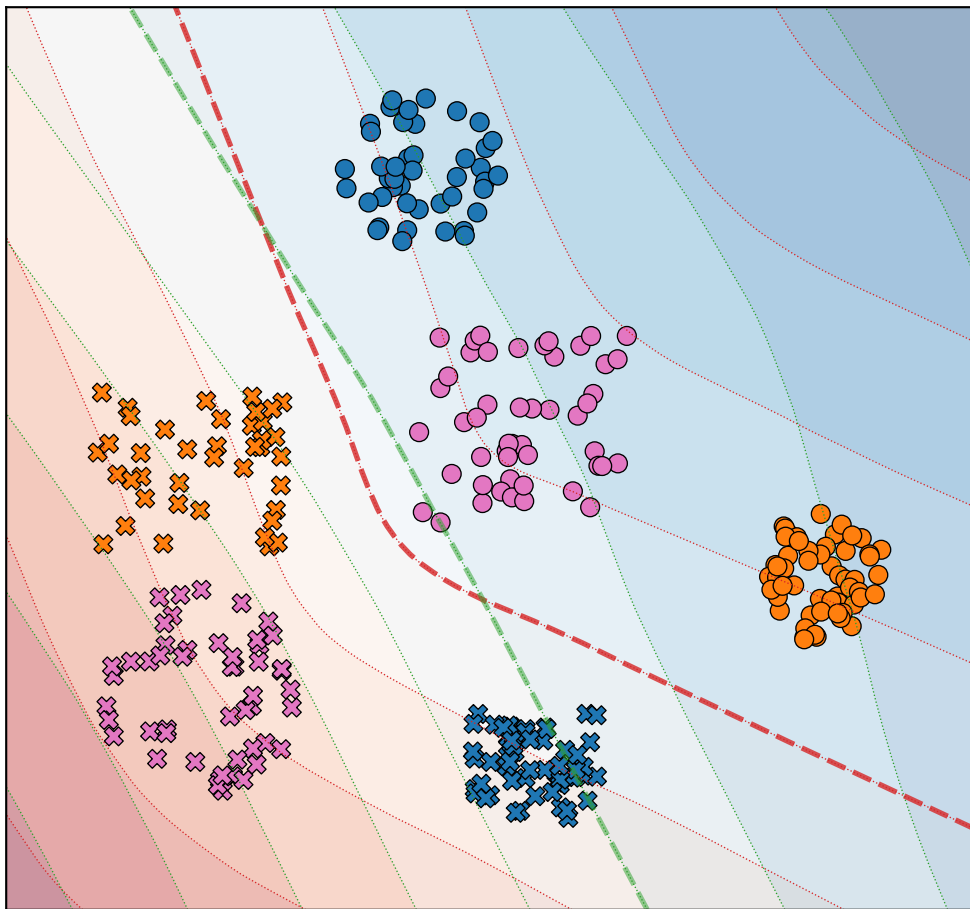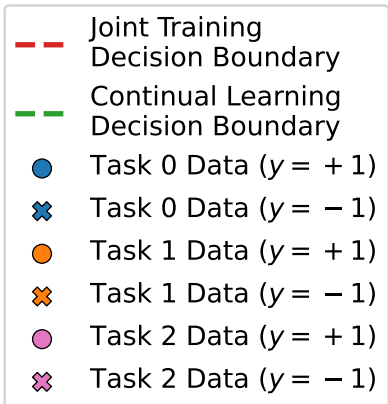

Supplement: supplementary_material [file attachment]



Supplement: supplementary_material [file attachment]

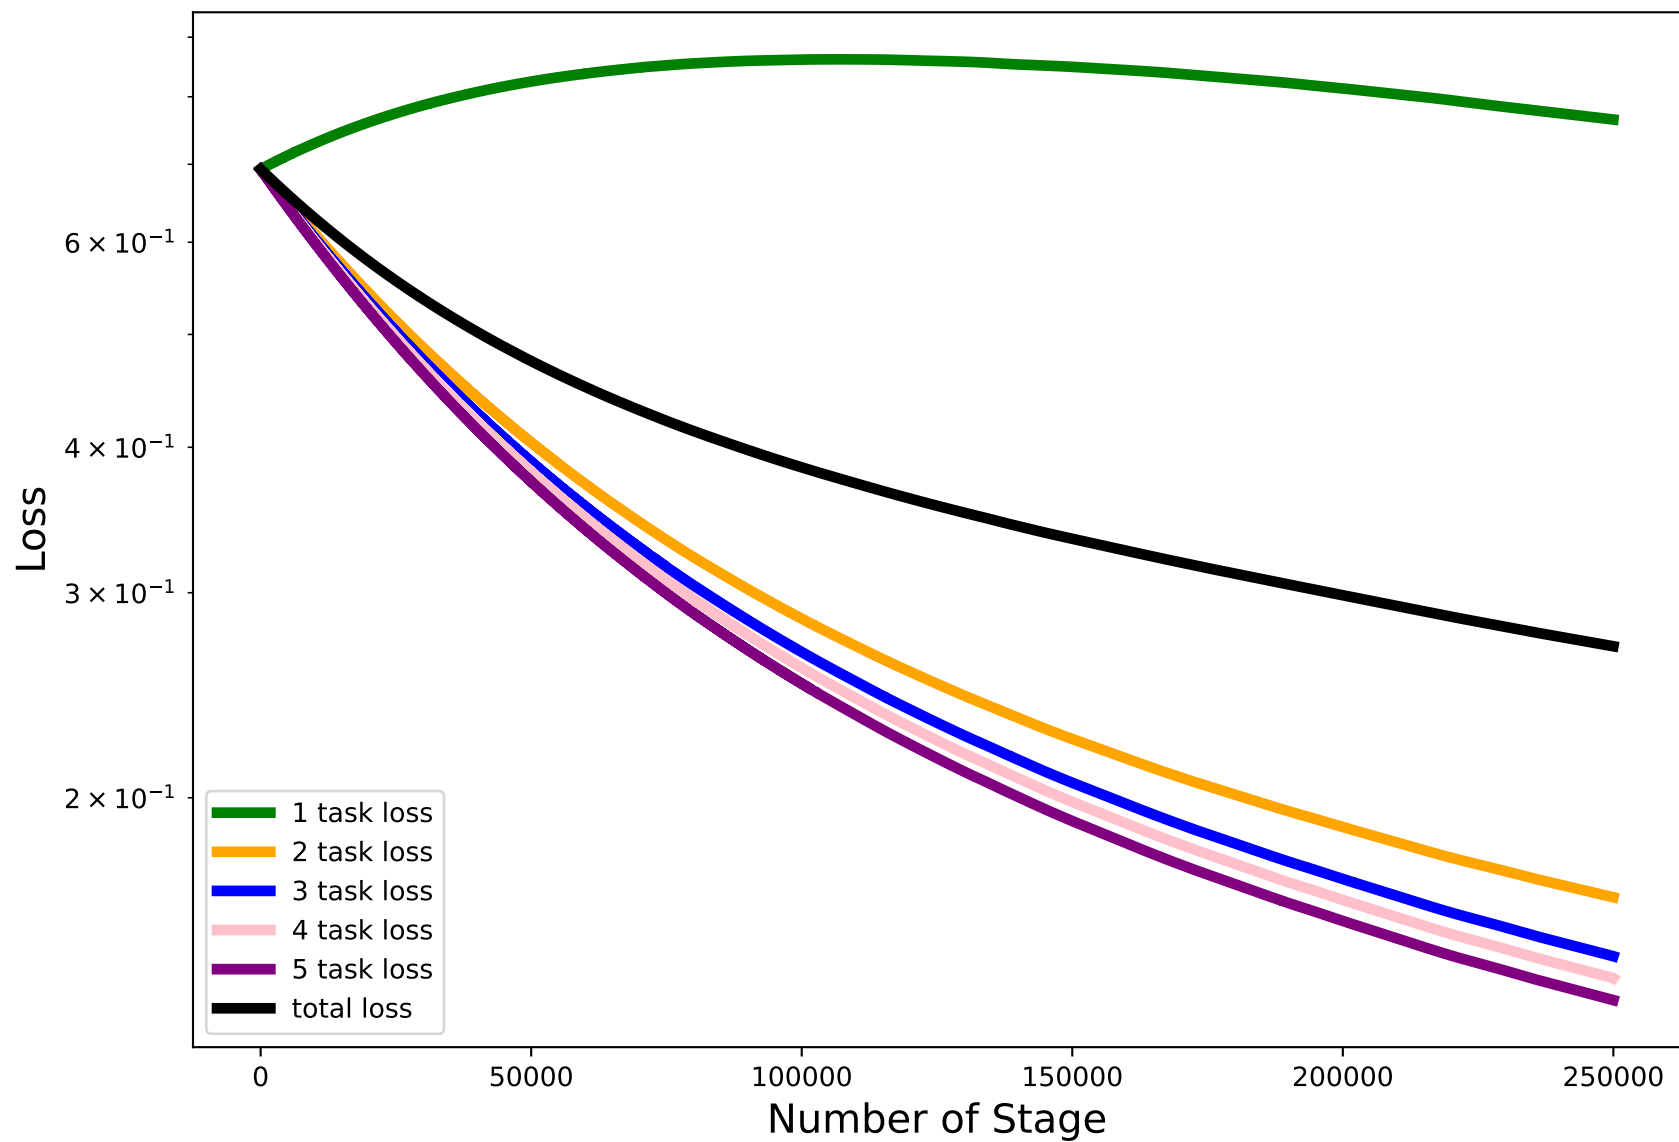

Supplement: supplementary_material [file attachment]

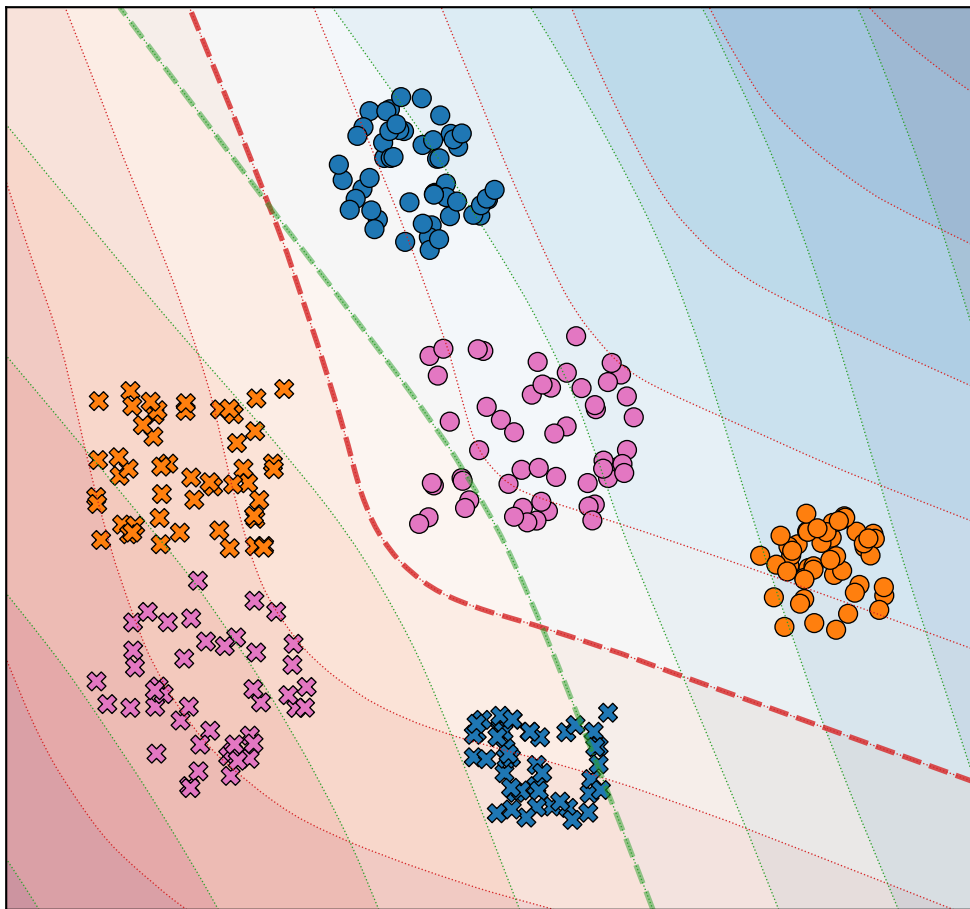

Supplement: supplementary_material [file attachment]

Loss: Jointly learned model

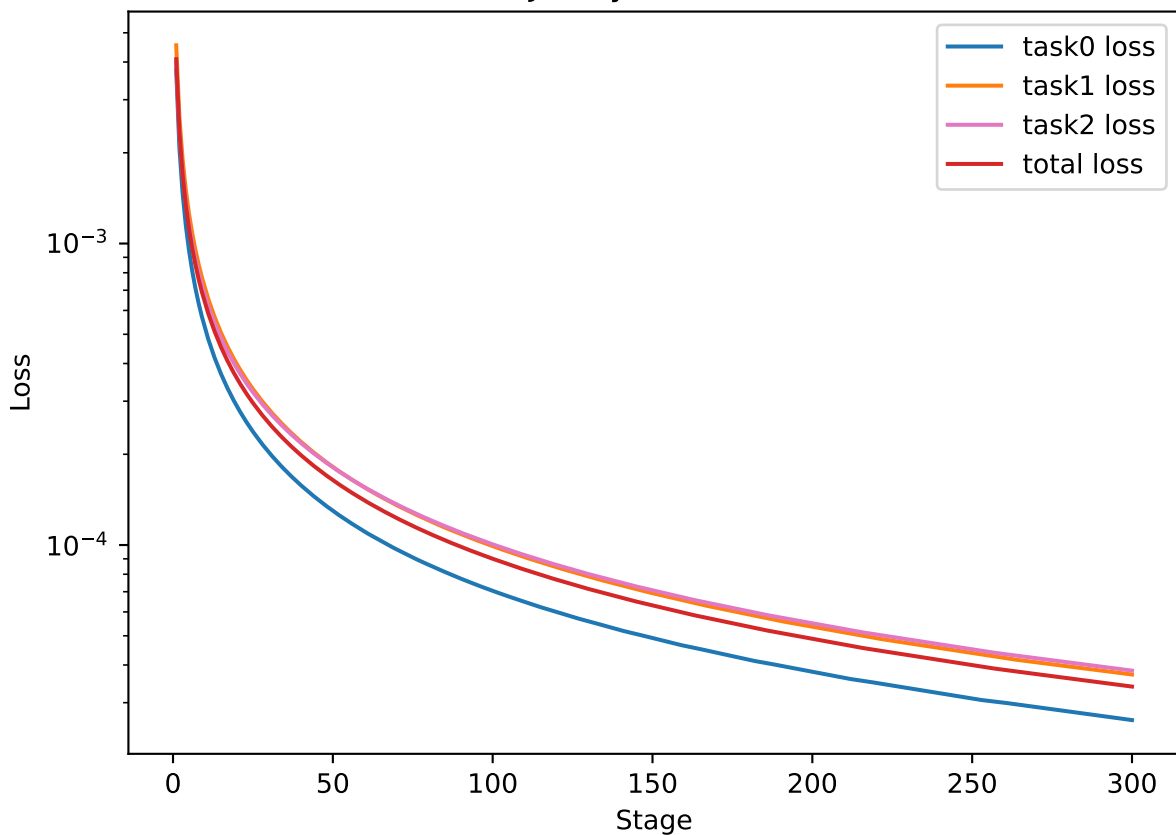

Supplement: supplementary_material [file attachment]

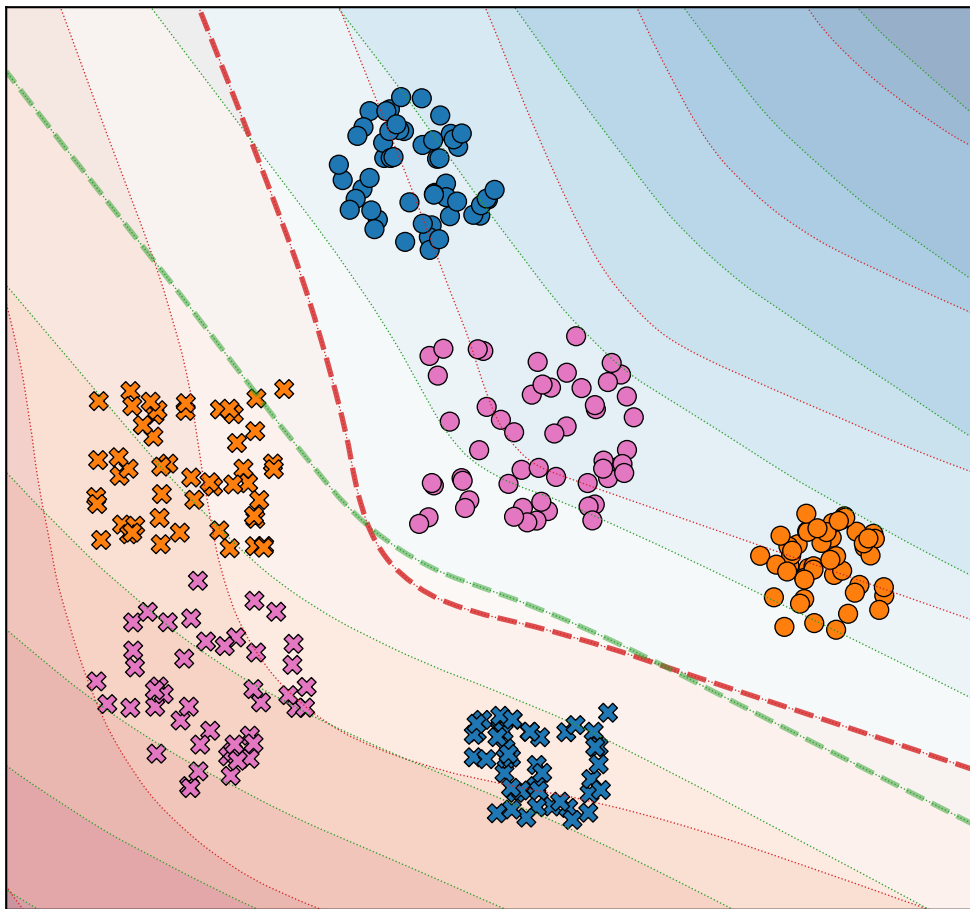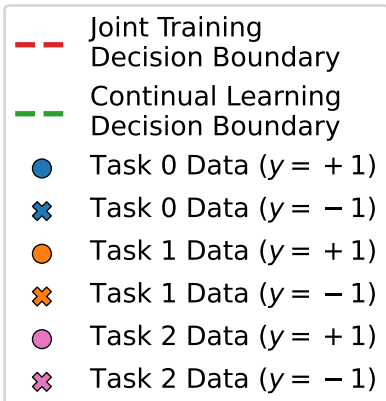

Supplement: supplementary_material [file attachment]

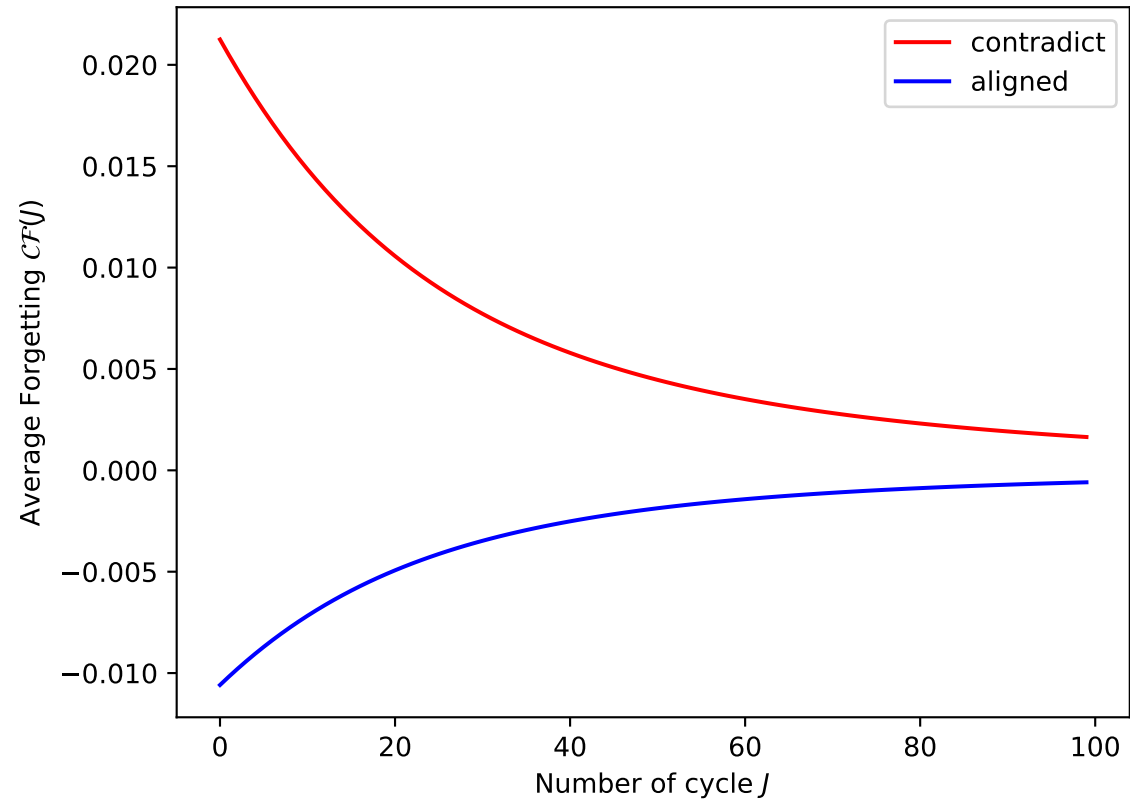

Supplement: supplementary_material [file attachment]

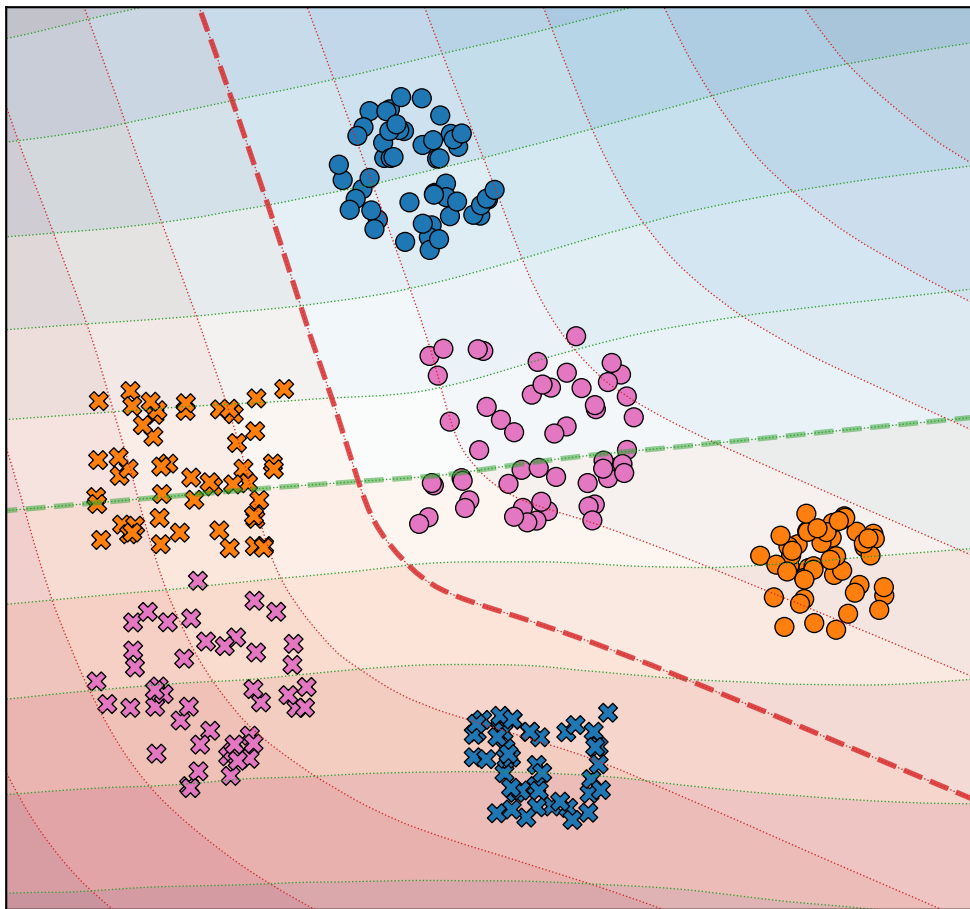

Supplement: supplementary_material [file attachment]

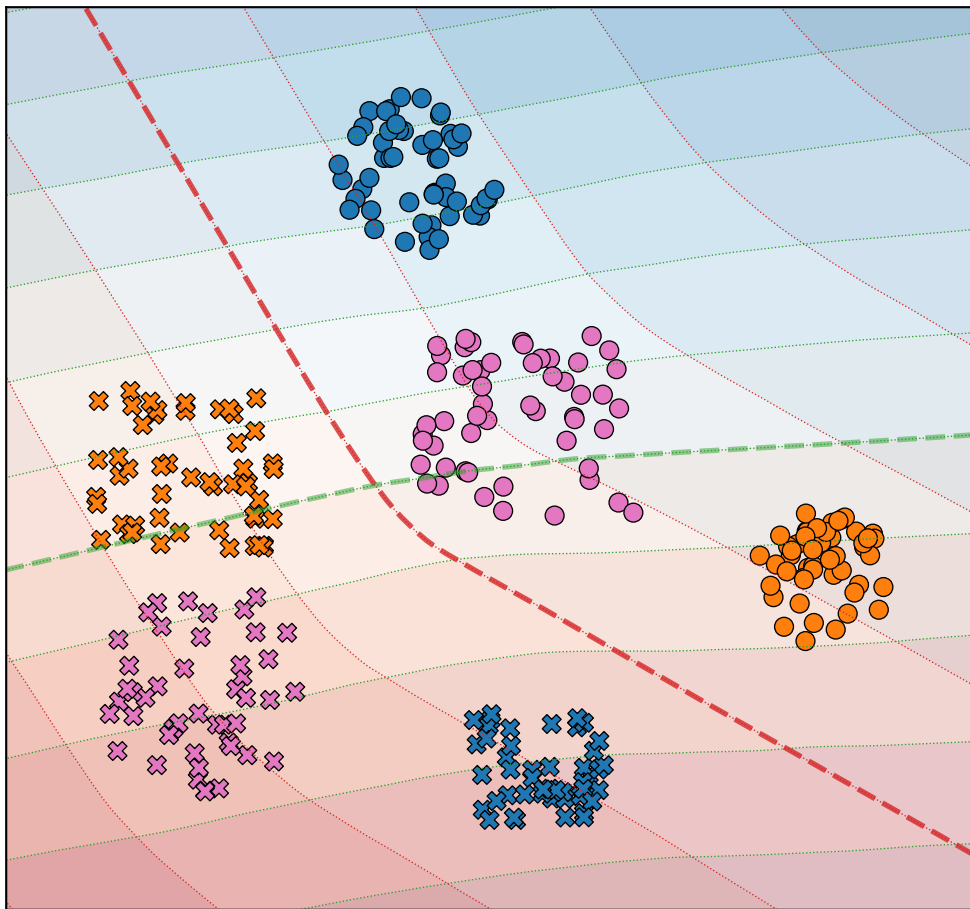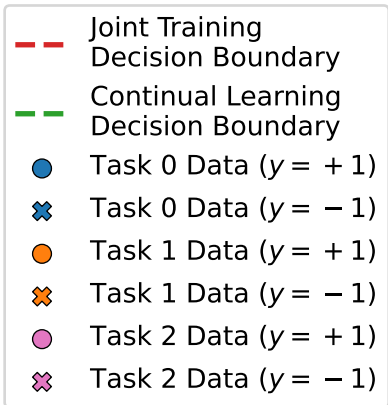

Supplement: supplementary_material [file attachment]

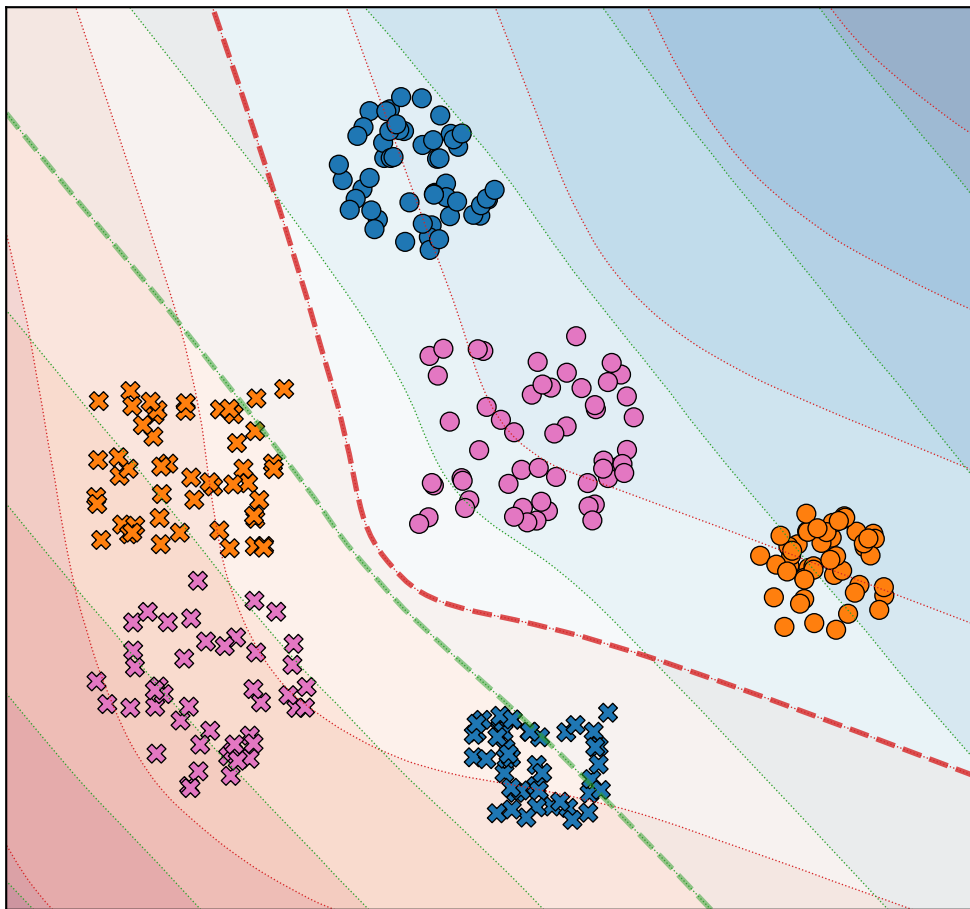

Supplement: supplementary_material [file attachment]

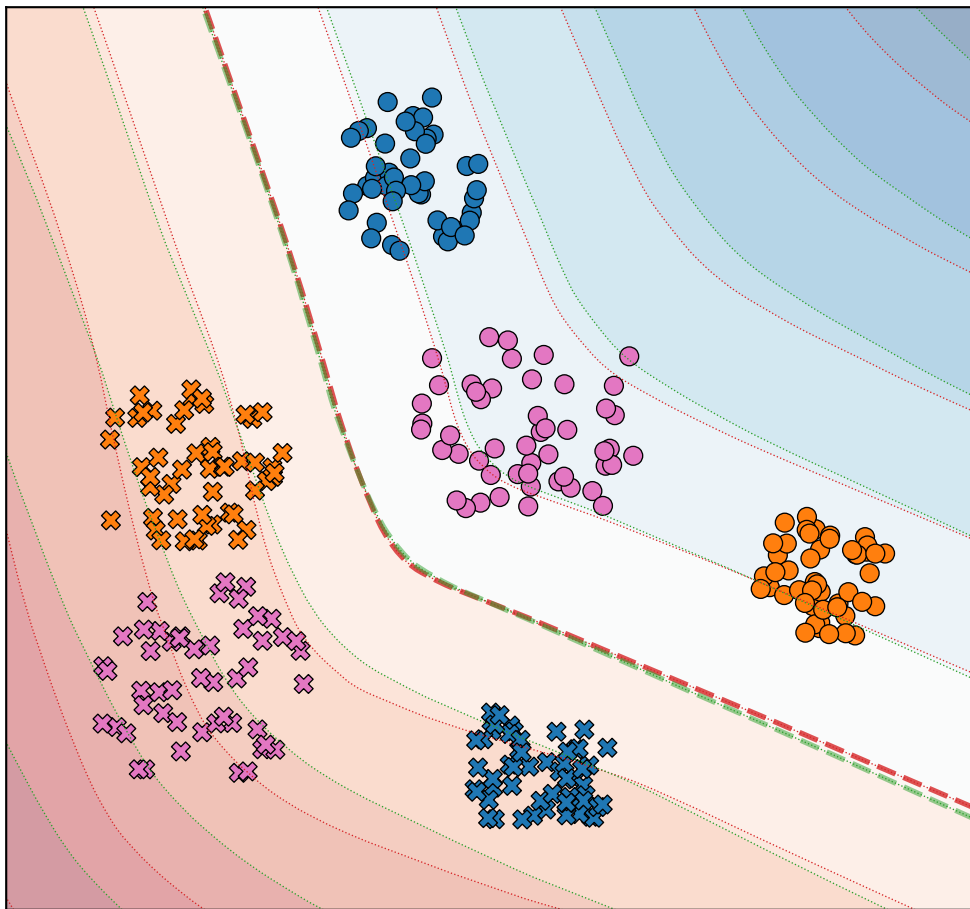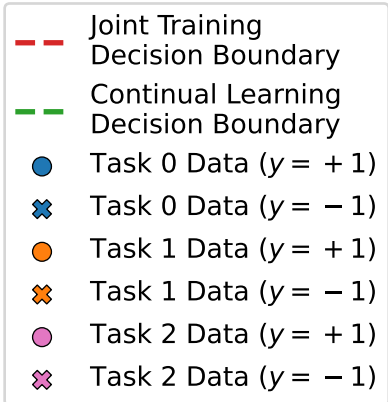

Supplement: supplementary_material [file attachment]

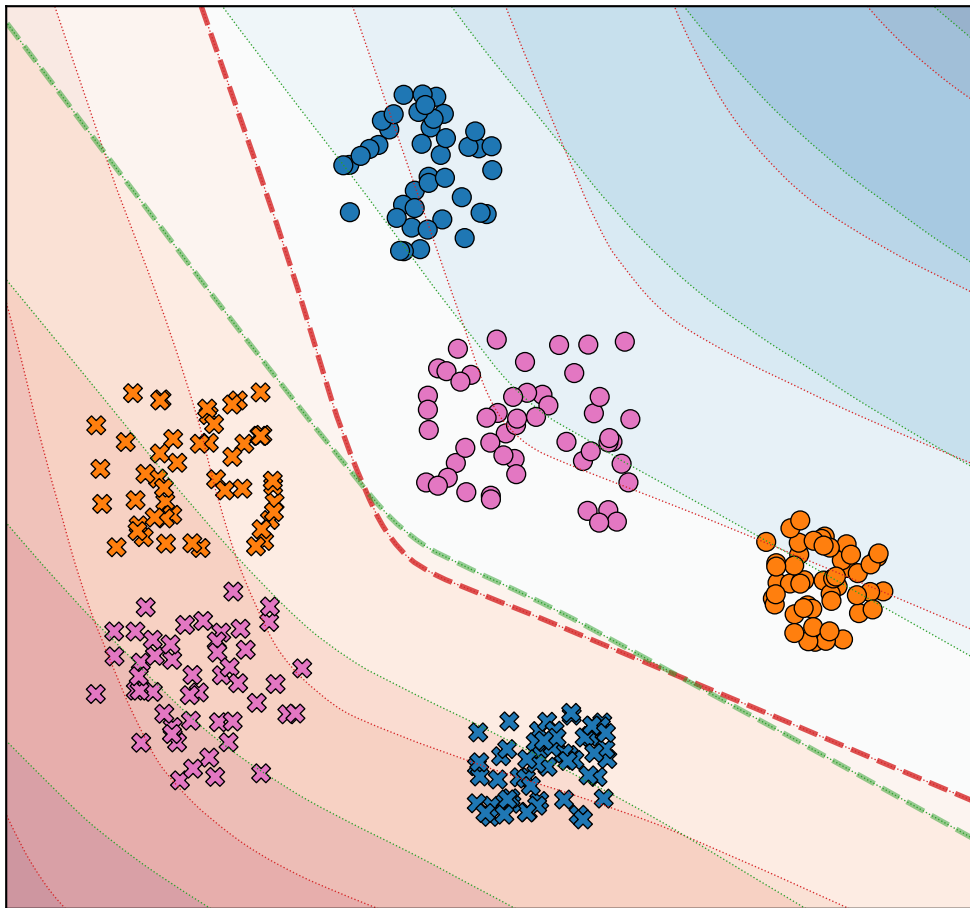

Supplement: supplementary_material [file attachment]

Loss: Jointly learned model

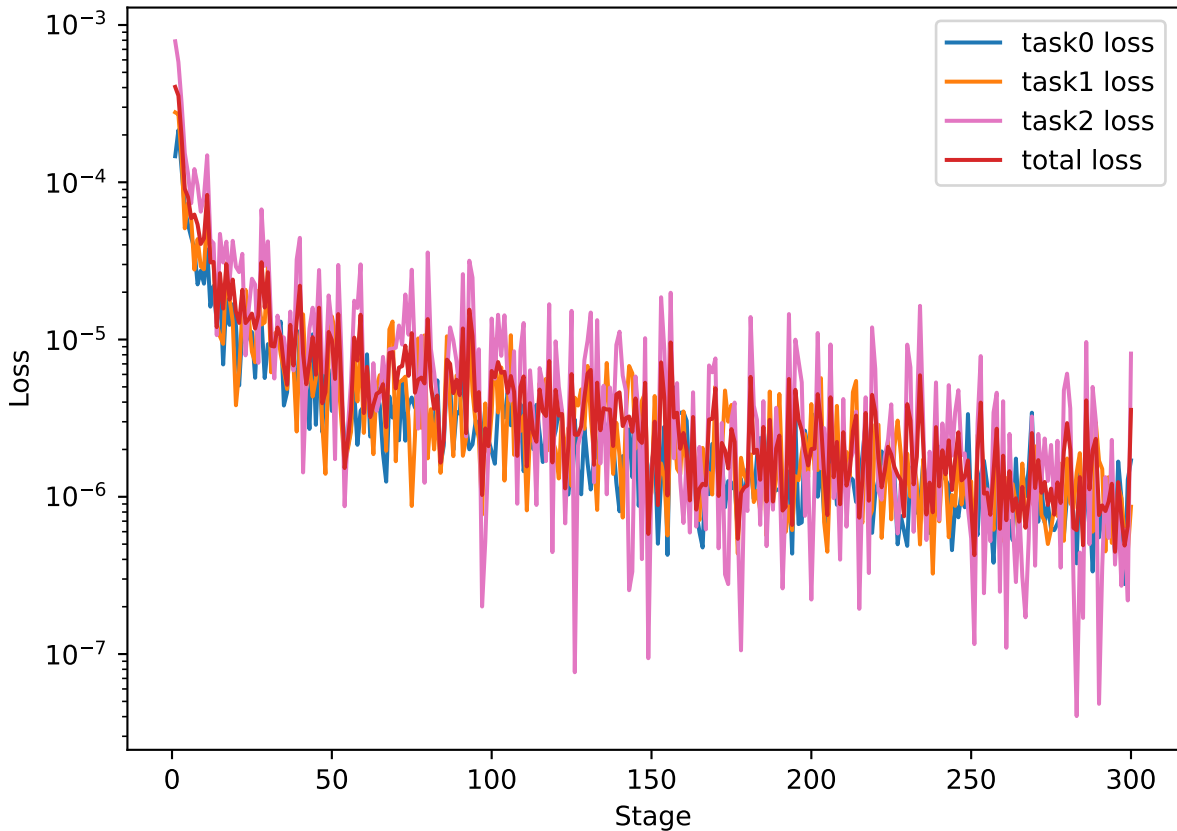

Supplement: supplementary_material [file attachment]

Loss: Continually learned model

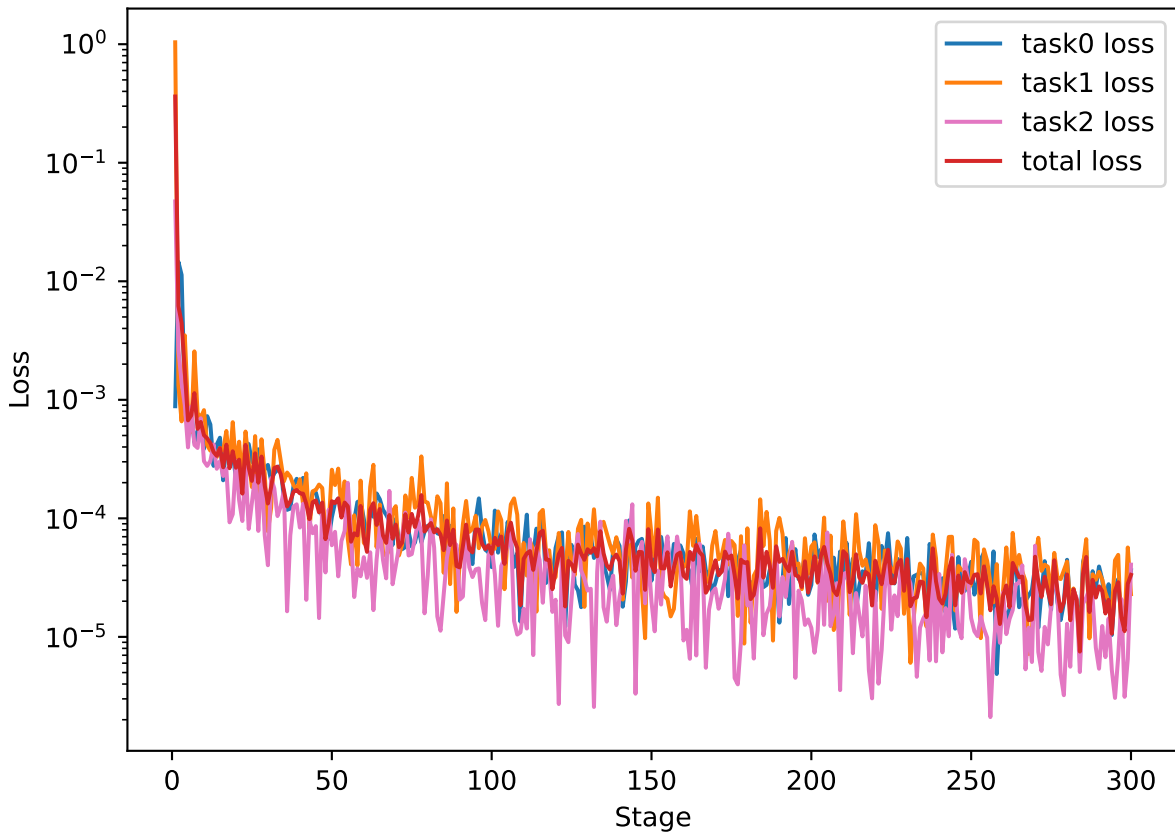

Supplement: supplementary_material [file attachment]

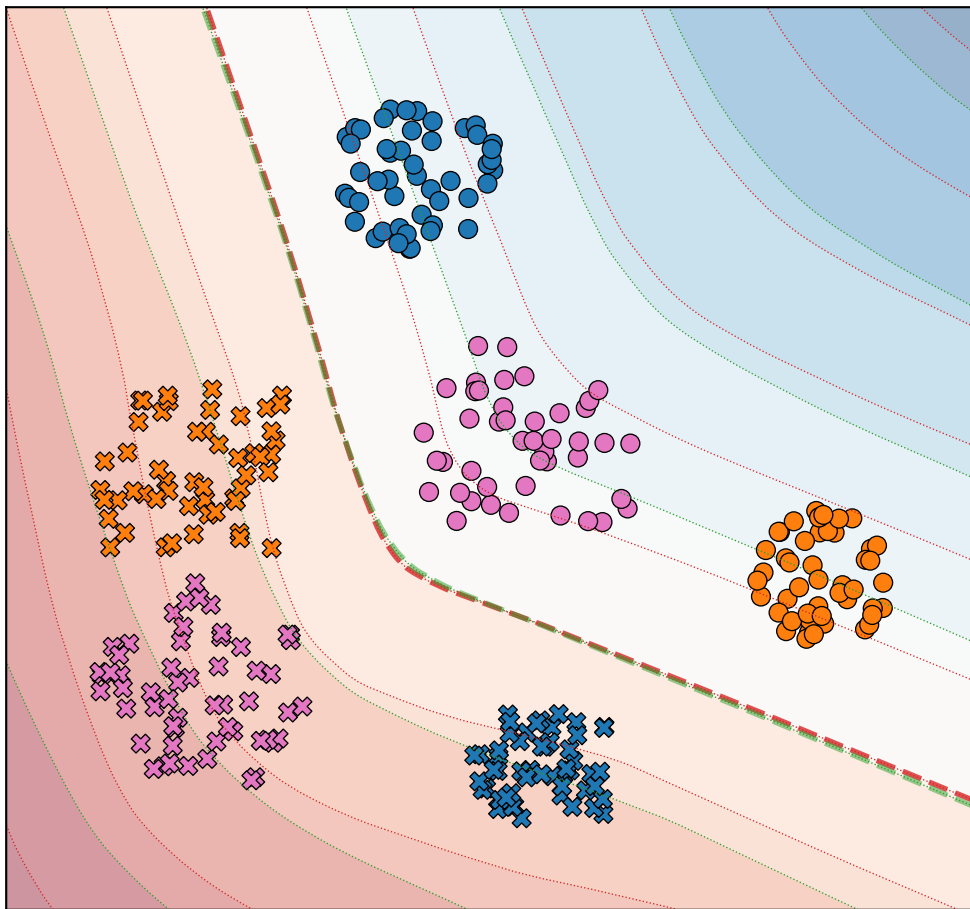

Supplement: supplementary_material [file attachment]

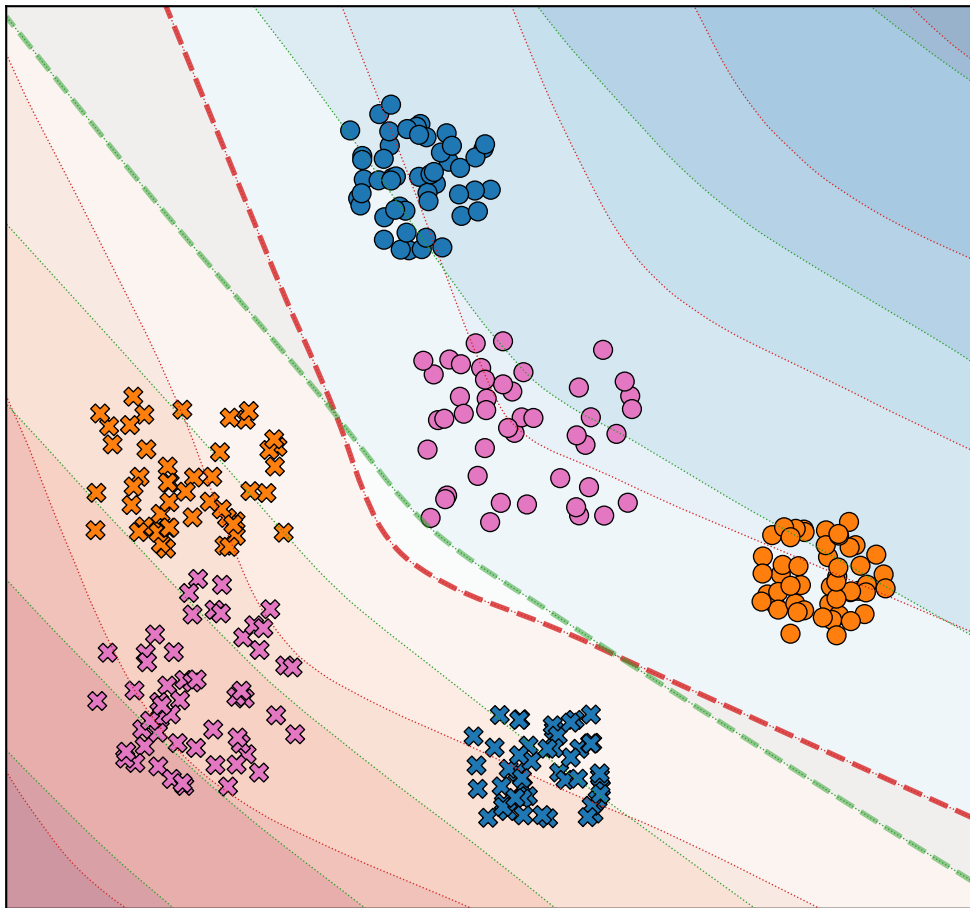

Supplement: supplementary_material [file attachment]

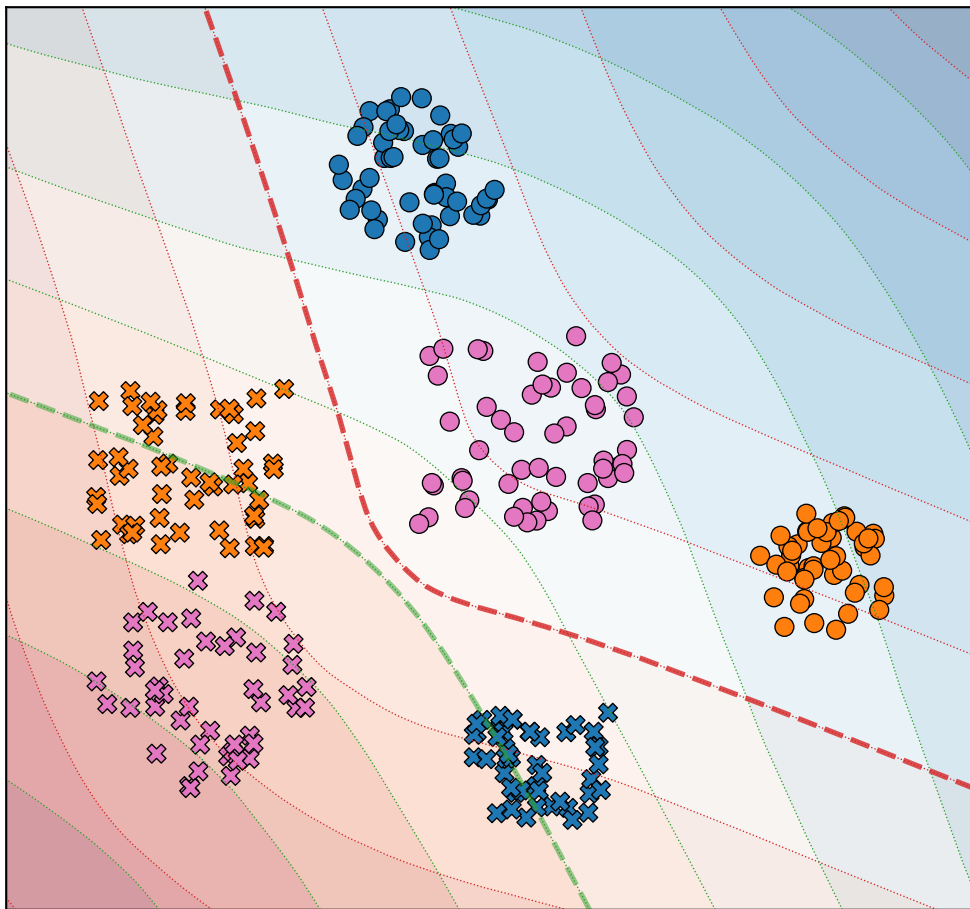

Supplement: supplementary_material [file attachment]

Sine Angle(  $= \sqrt{1 - \text{cossim}^2}$  )  
between Linear Model vs. Joint Max-Margin

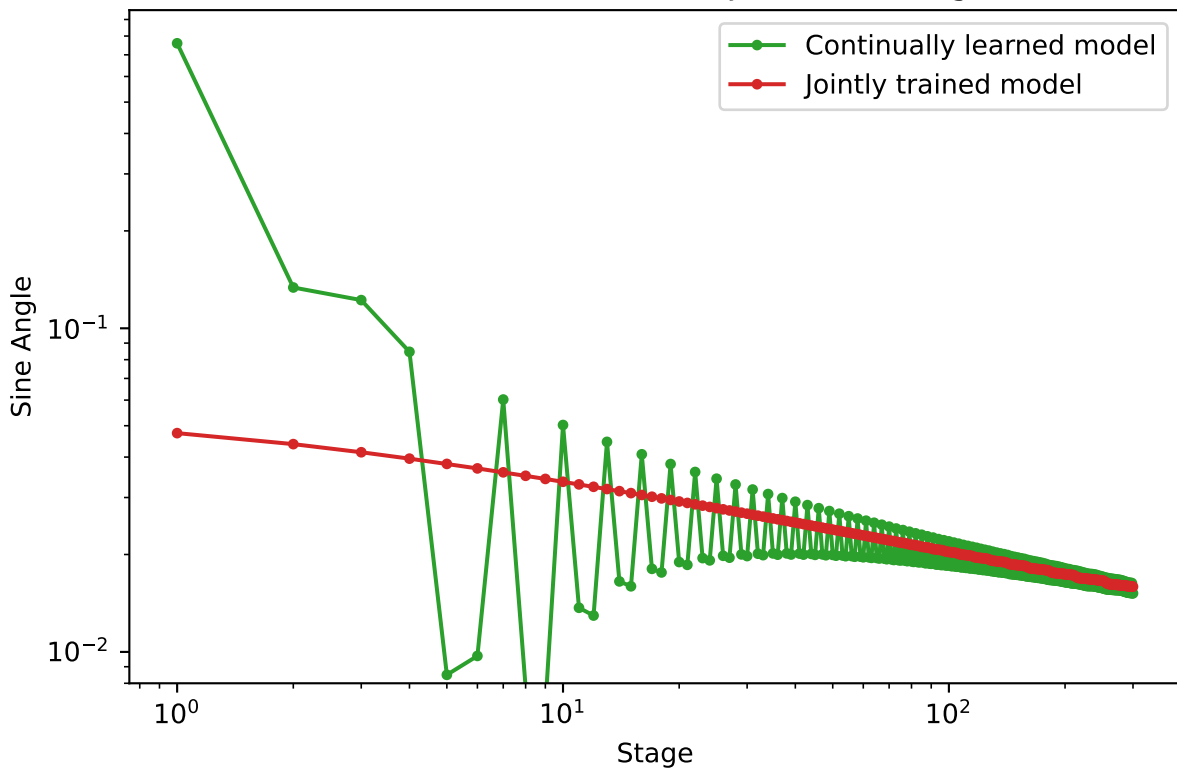

Supplement: supplementary_material [file attachment]

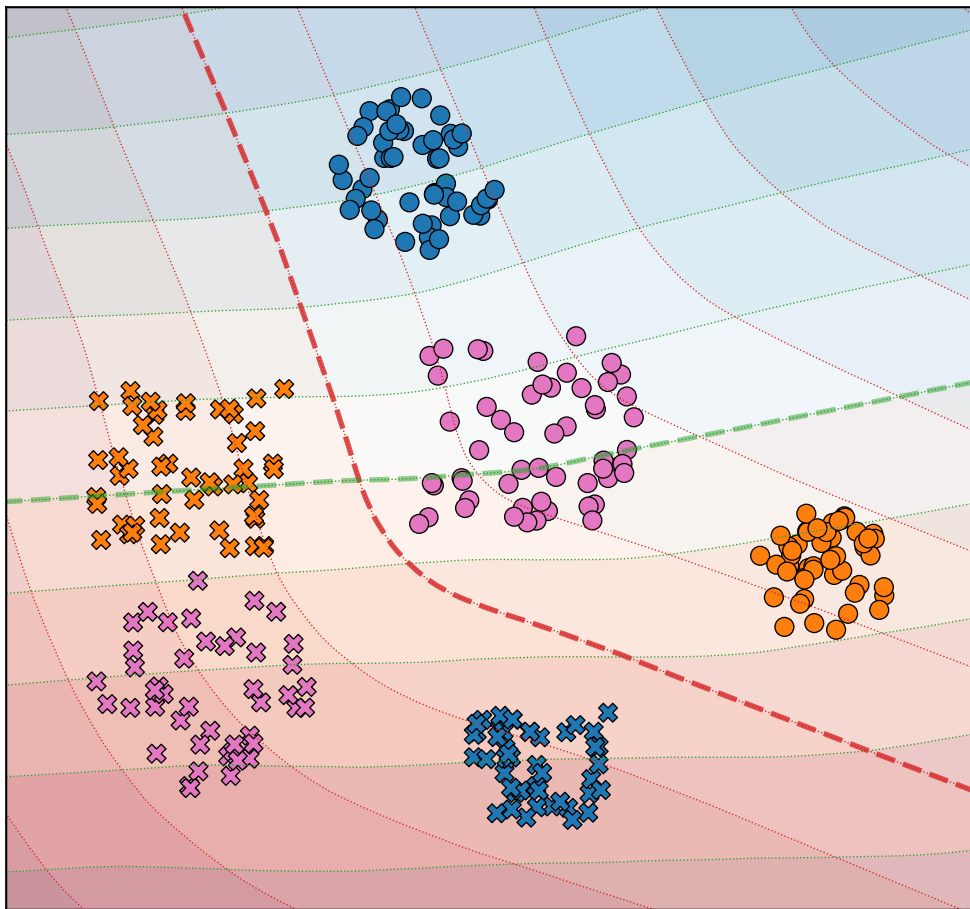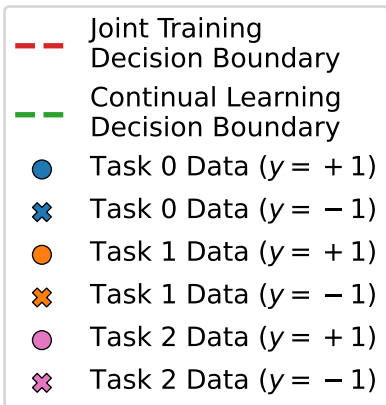

Supplement: supplementary_material [file attachment]

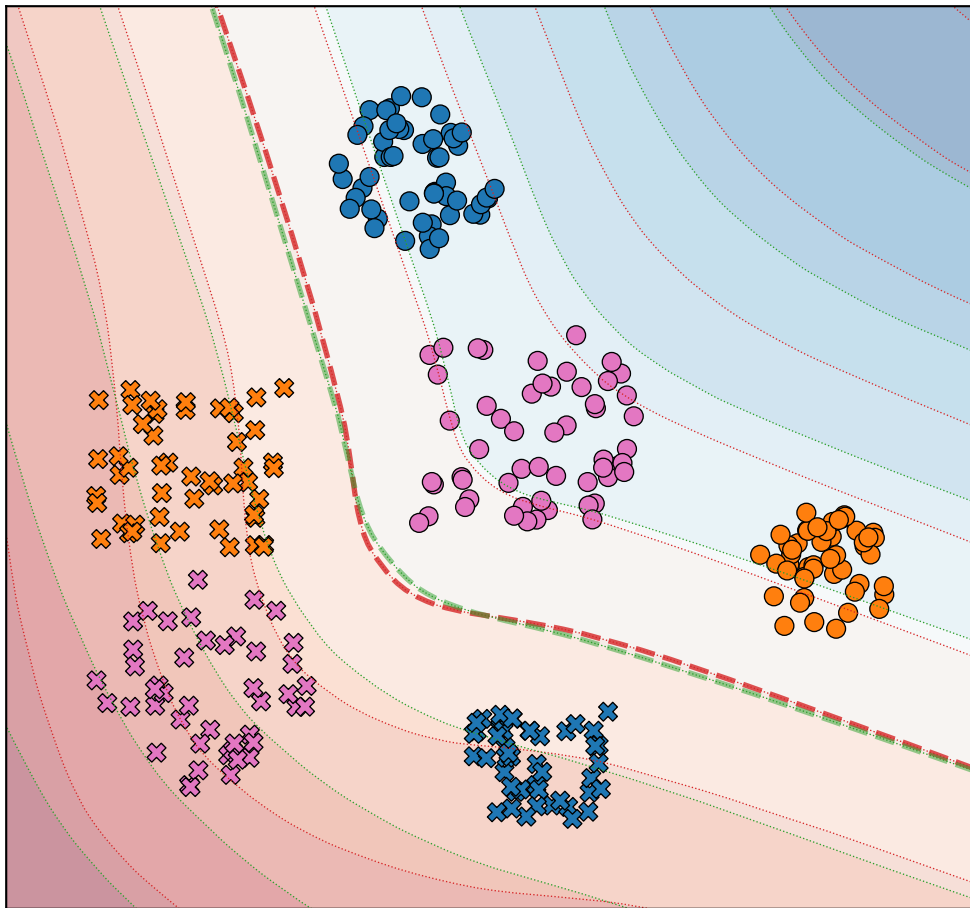

Supplement: supplementary_material [file attachment]

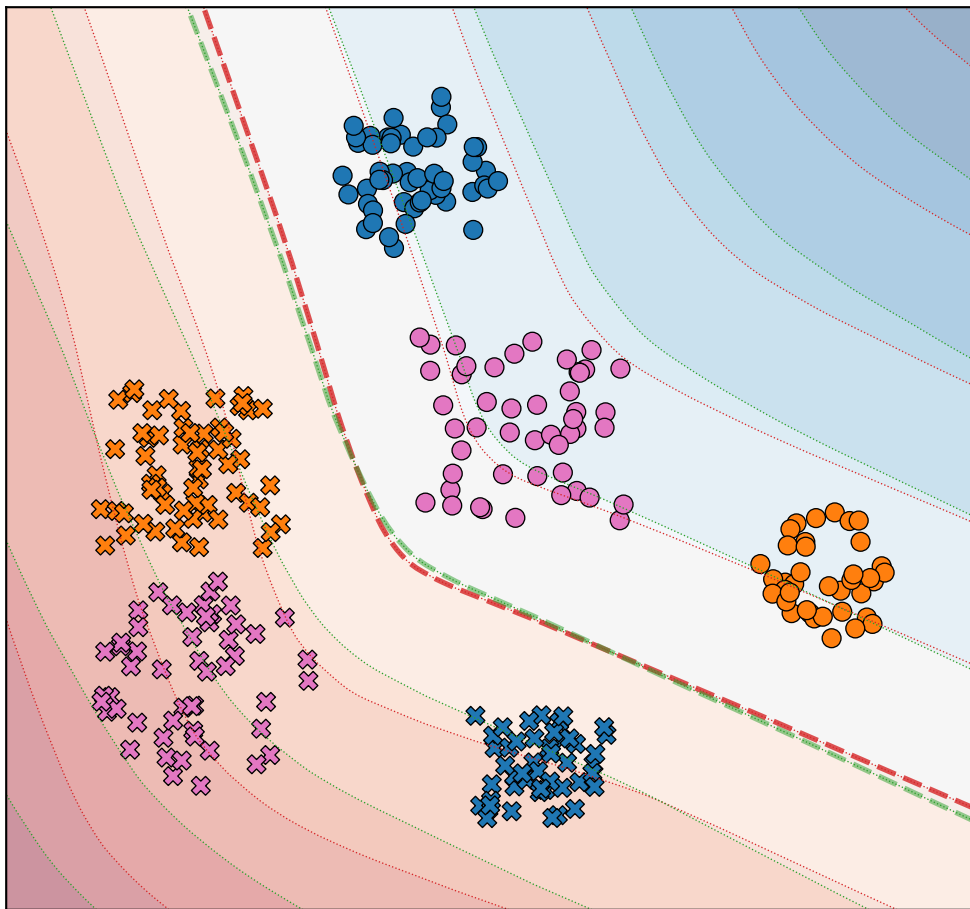

Supplement: supplementary_material [file attachment]
